# Supplementary material for: Iron-catalyzed aryl-aryl cross coupling route for the synthesis of 1-(2-amino)-phenyl)dibenzo[b,d]furan-2-ol derivatives and their biological evaluation
Source: Royal Society of Chemistry journal article supplement (doi:10.1039/c3ra43345e), 2013-01-01
Supplement: c3ra43345e.pdf [file c3ra43345e.pdf]

# Supporting Information

## Iron-Catalyzed Aryl-Aryl Cross Coupling Route for the synthesis of 1-(2-amino)-phenyl)dibenzo[b,d]furan-2-ol Derivatives and their Biological Evaluation

BarreddiChiranjeevi<sup>a,1</sup>, Ganesh Koyyada<sup>a</sup>, S. Prabusreenivasan<sup>b</sup>, Vanaja Kumar<sup>b</sup>, PombalaSujitha<sup>c</sup>, C. Ganesh Kumar<sup>c</sup>, B. Sridhar<sup>d</sup>, SaidaShaik<sup>e</sup>, MalapakaChandrasekharam<sup>a,\*</sup>

<sup>a</sup>Inorganic and Physical Chemistry Division <sup>e</sup>Medicinal Chemistry and Phormacology Division

<sup>d</sup>Center for X-ray Crystallography <sup>e</sup>Analytical Division CSIR-Indian Institute of Chemical Technology, Uppal Road, Tarnaka, Hyderabad-500 007, India

<sup>b</sup>Tuberculosis Research Centre, V.R. Ramanathan Road, Chennai 600 031, India

---

### List of Contents

1. <sup>1</sup>H and <sup>13</sup>C NMR spectra of the compounds —————→ S2-S15

2. HPLC analysis —————→ S16-S29

---

**<sup>1</sup>H and <sup>13</sup>C NMR spectra of the compounds**

**<sup>1</sup>H & <sup>13</sup>C NMR spectra of DBF-3**

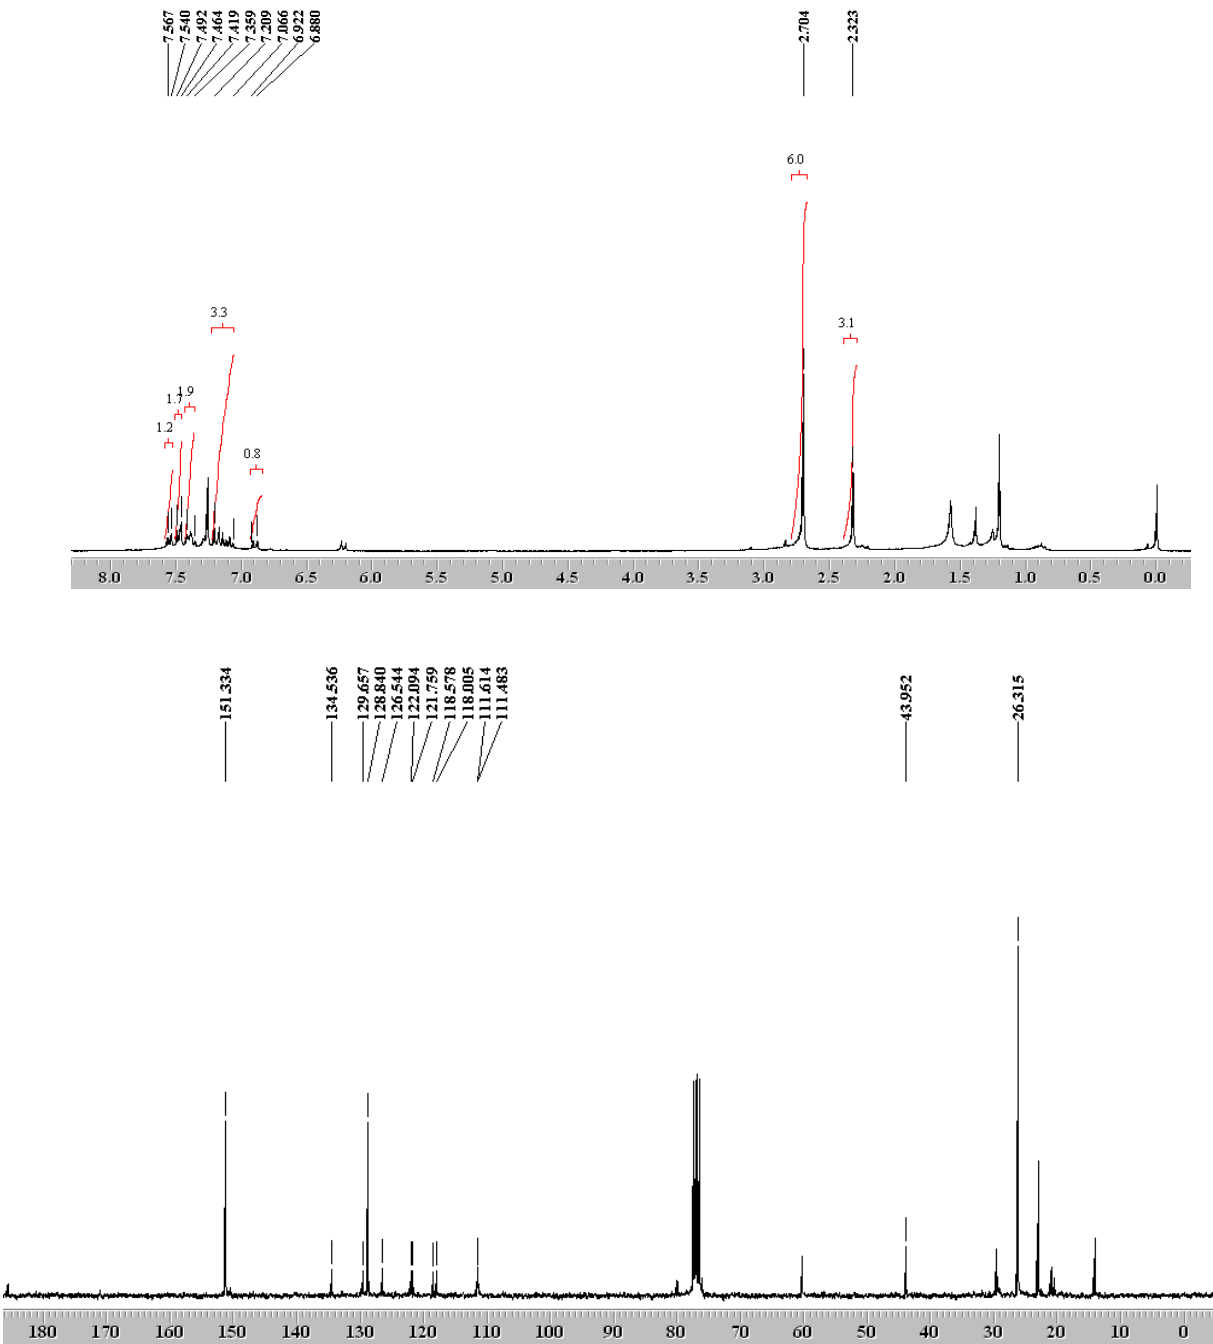

<sup>1</sup>H & <sup>13</sup>C NMR spectra of DBF-7

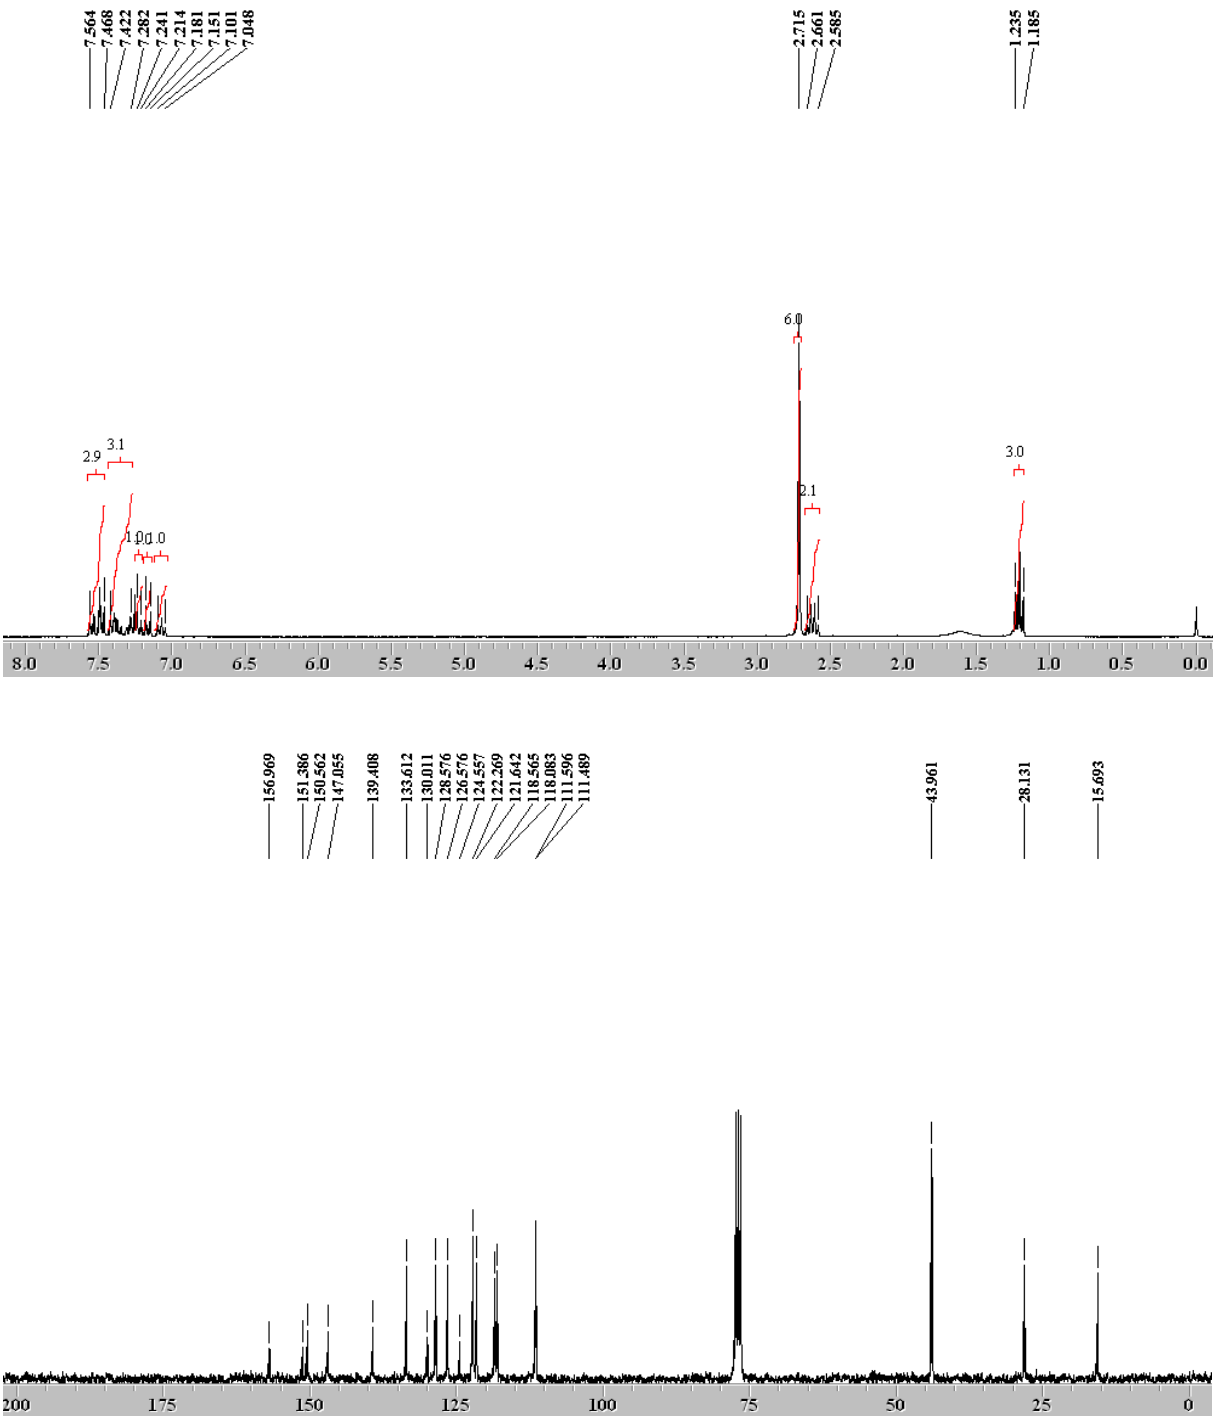

<sup>1</sup>H & <sup>13</sup>C NMR spectra of DBF-4

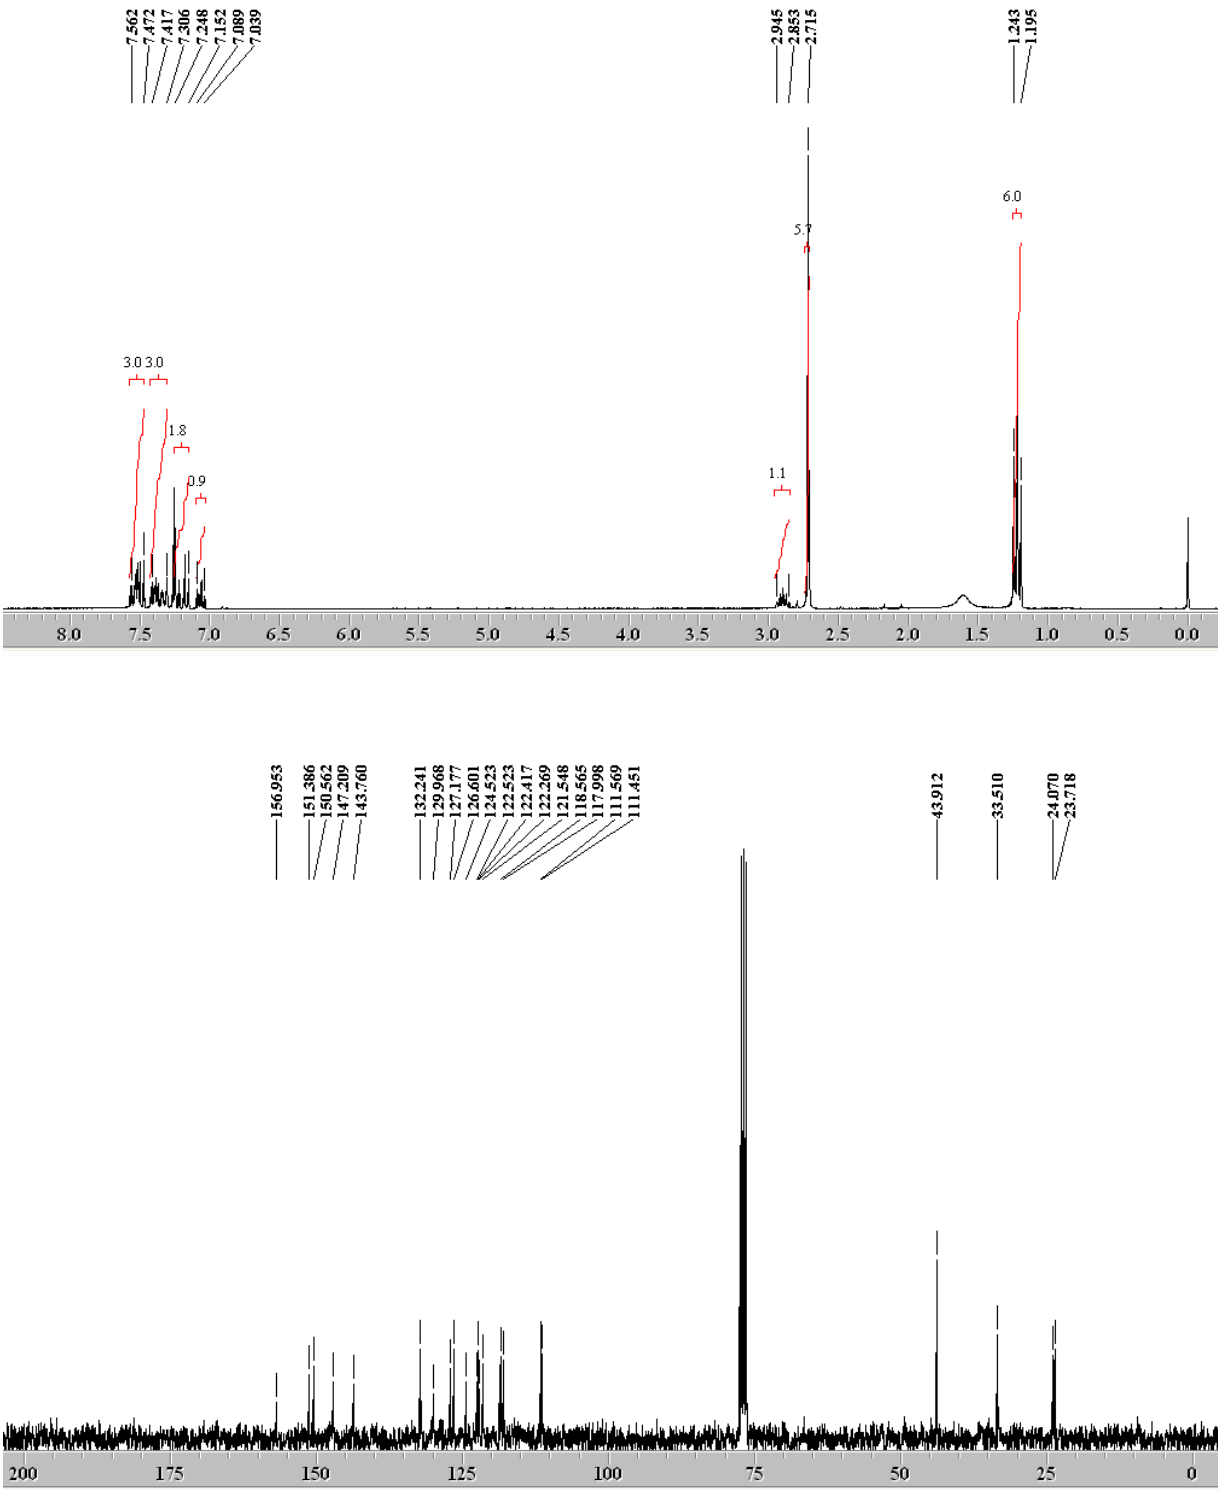

<sup>1</sup>H & <sup>13</sup>C NMR spectra of DBF-5

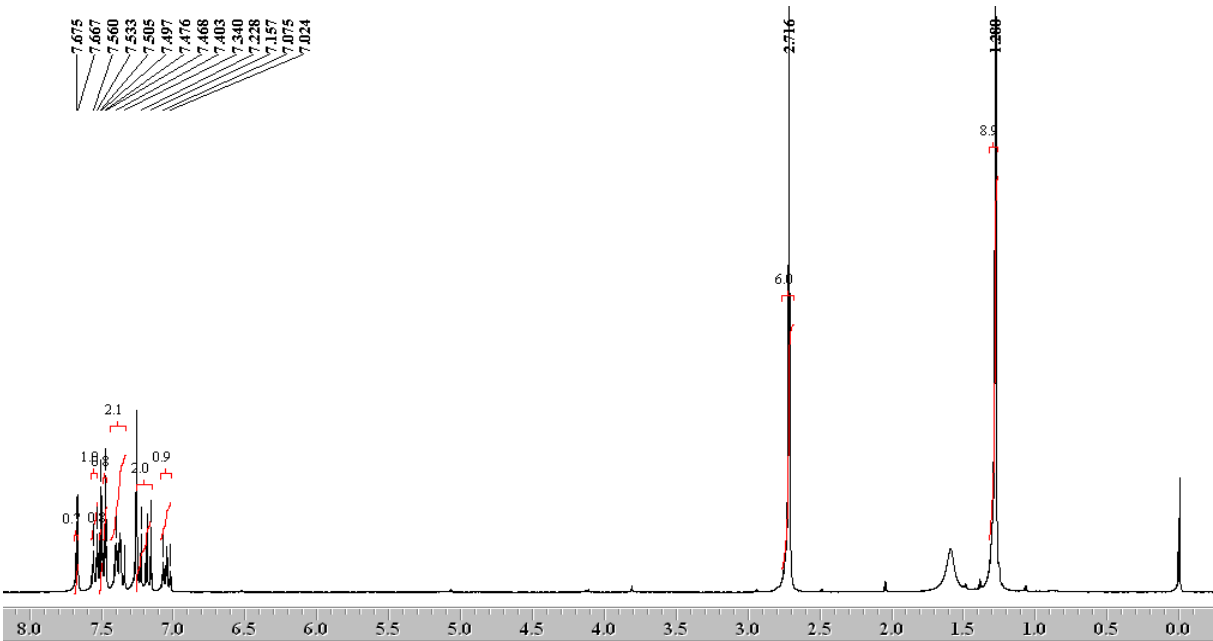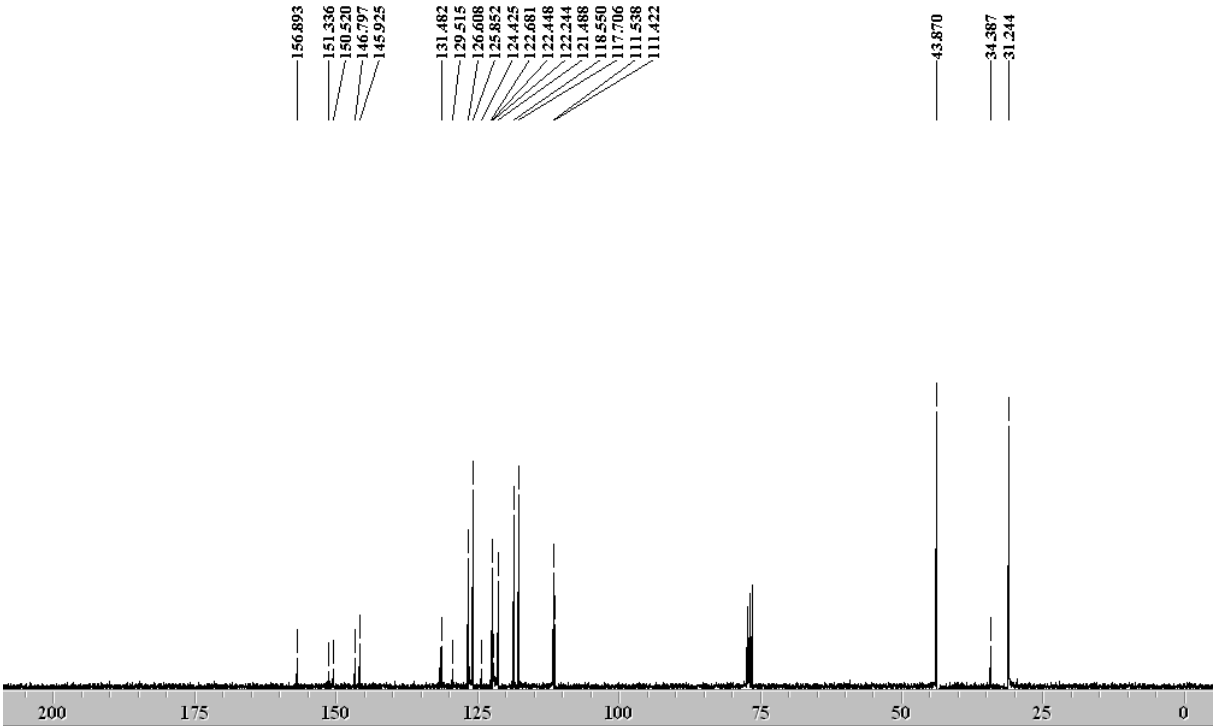

<sup>1</sup>H & <sup>13</sup>C NMR spectra of DBF-8

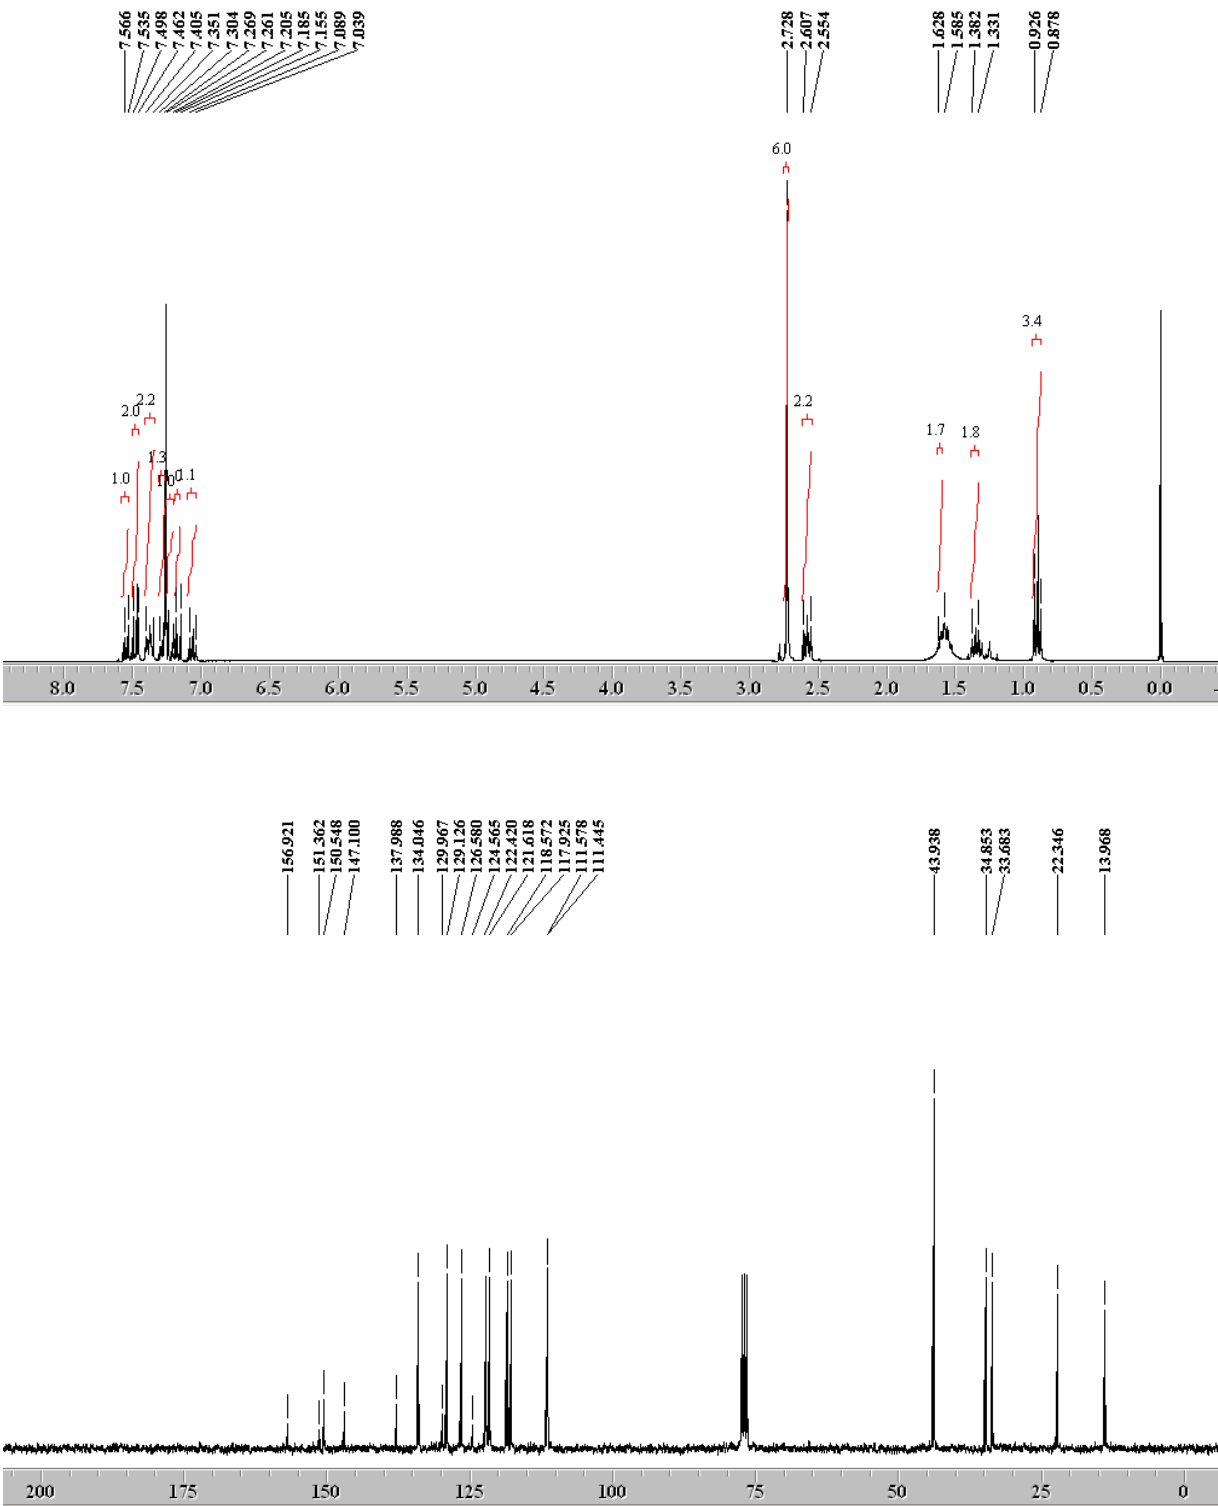

<sup>1</sup>H & <sup>13</sup>C NMR spectra of DBF-14

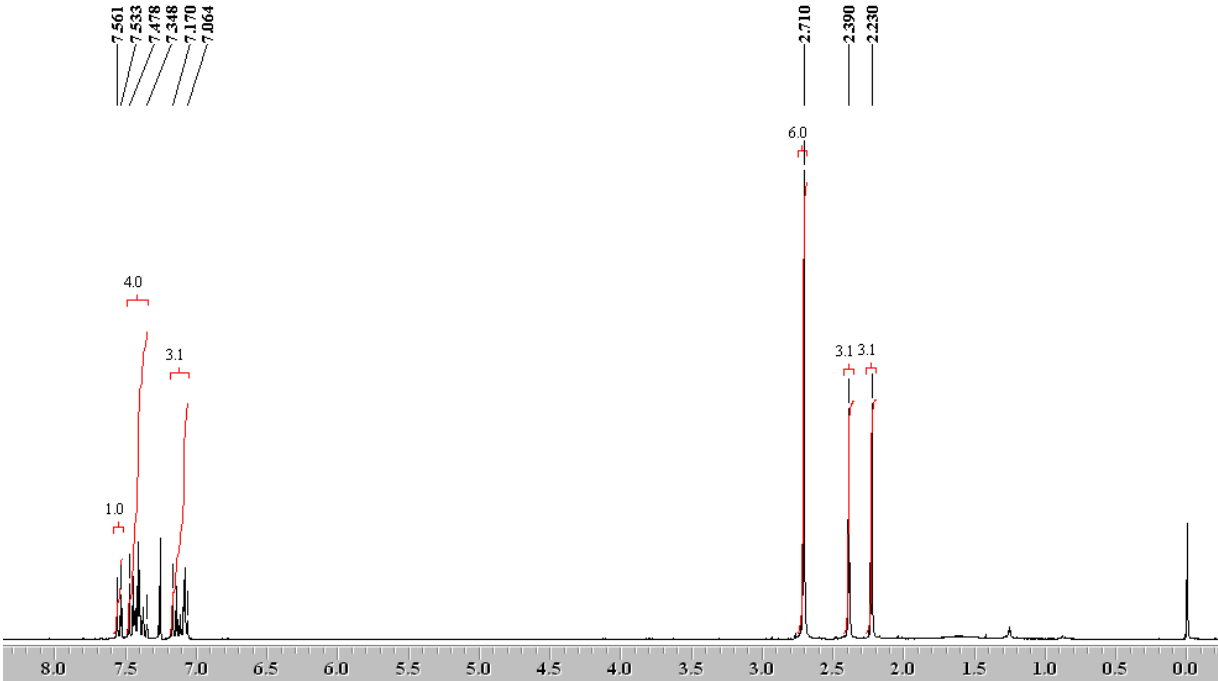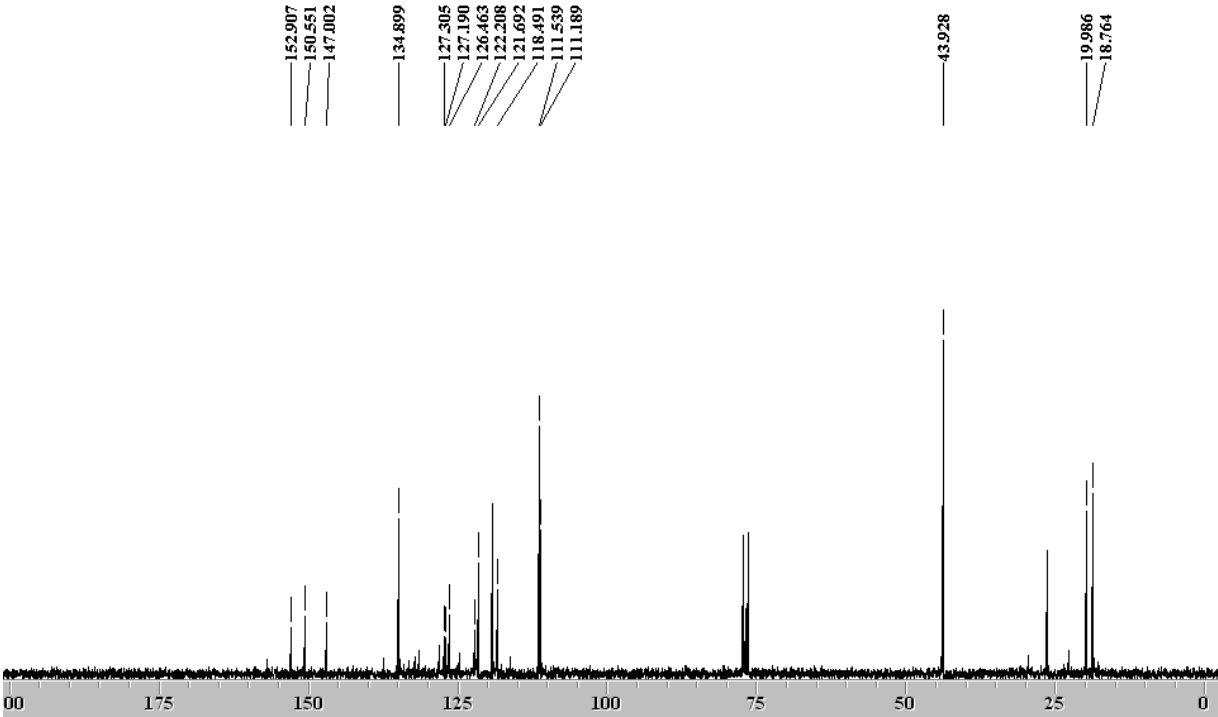

<sup>1</sup>H & <sup>13</sup>C NMR spectra of DBF-13

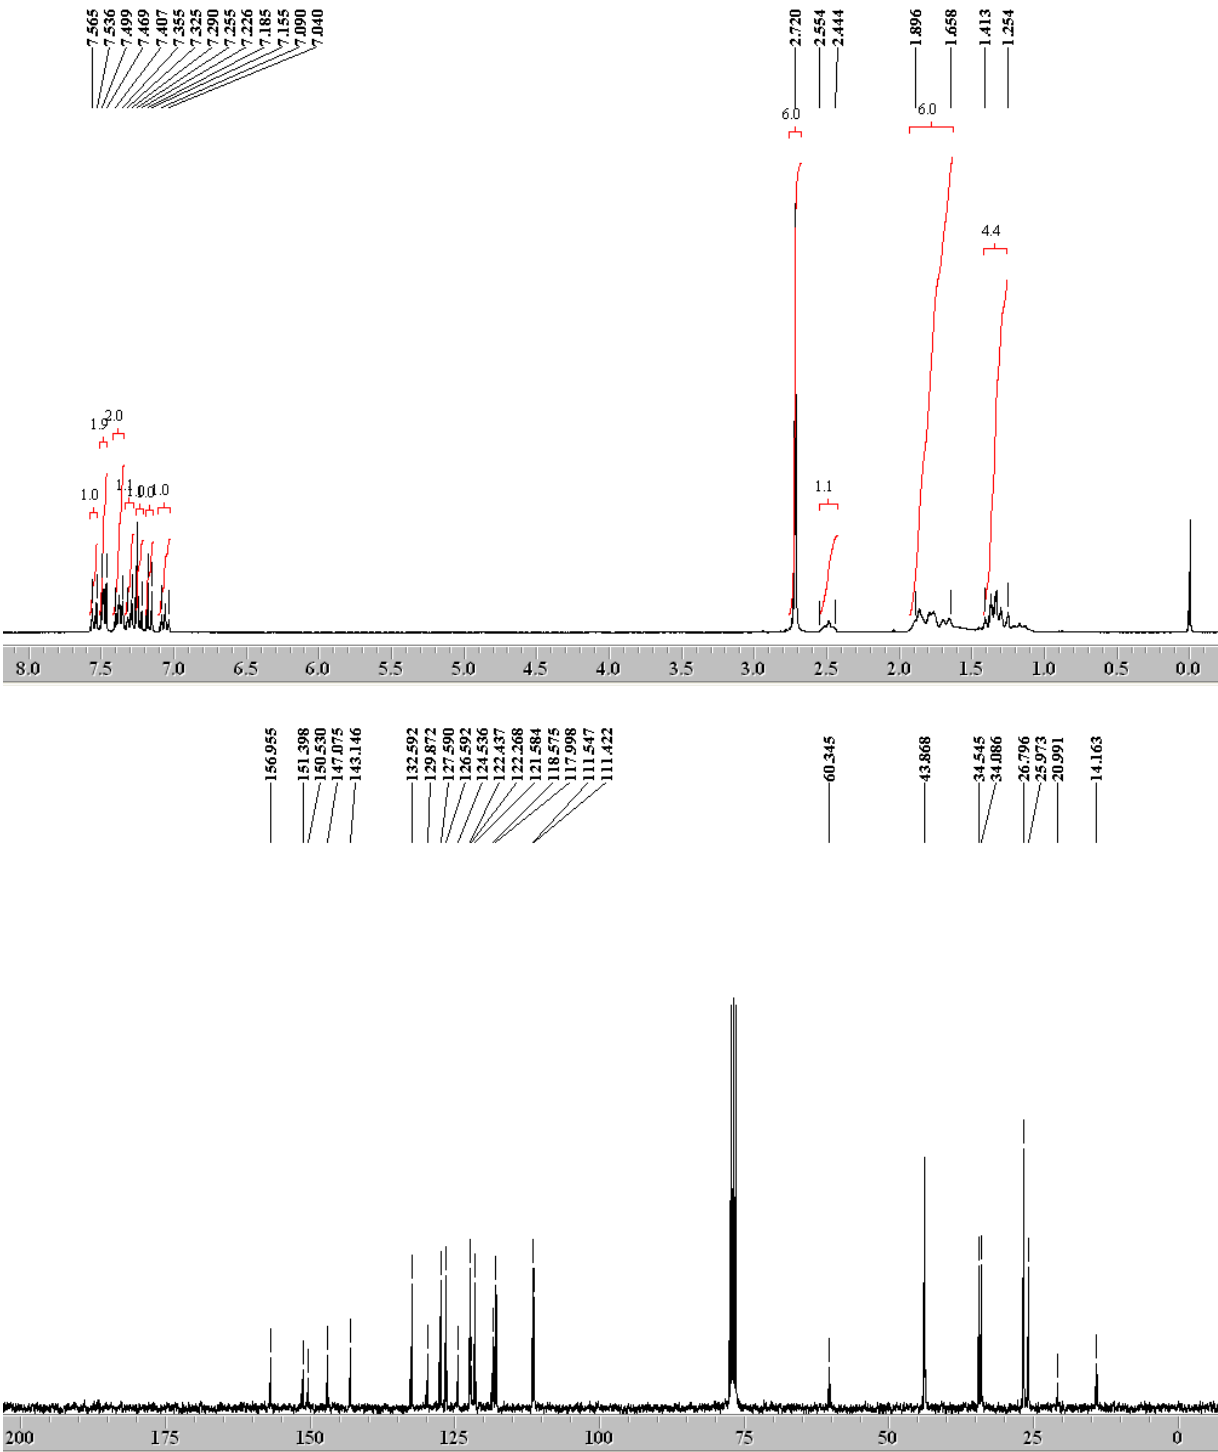



<sup>1</sup>H & <sup>13</sup>C NMR spectra of DBF-20

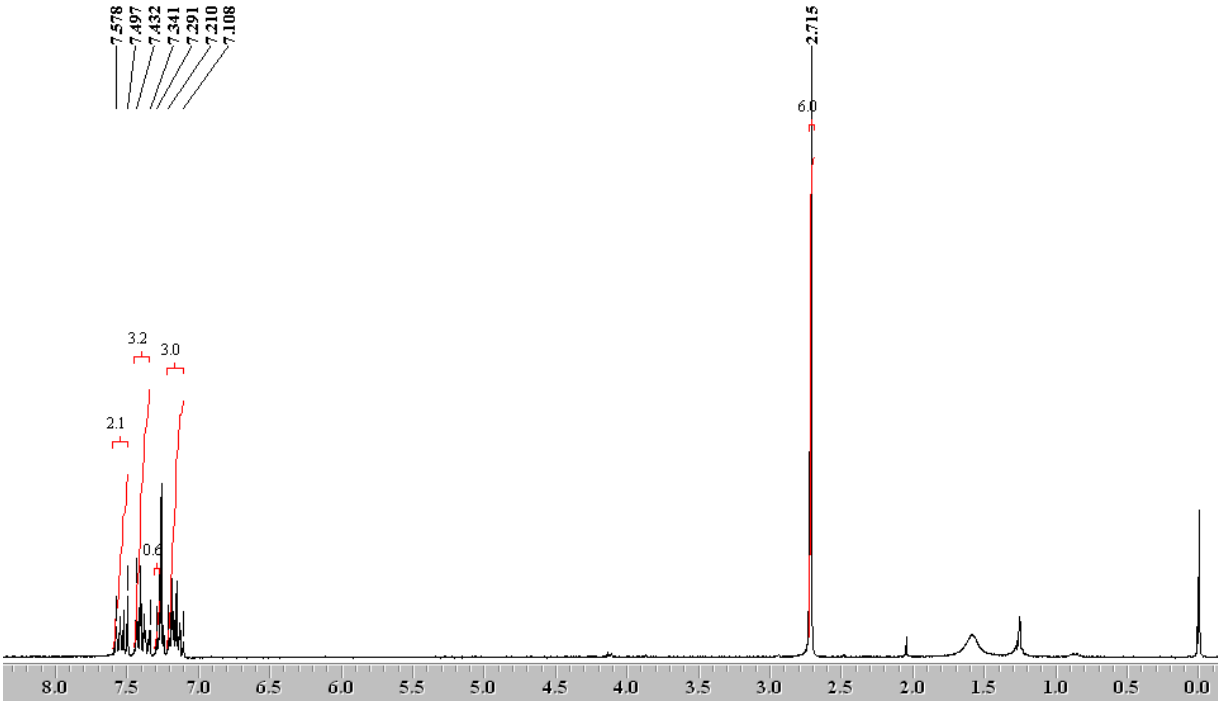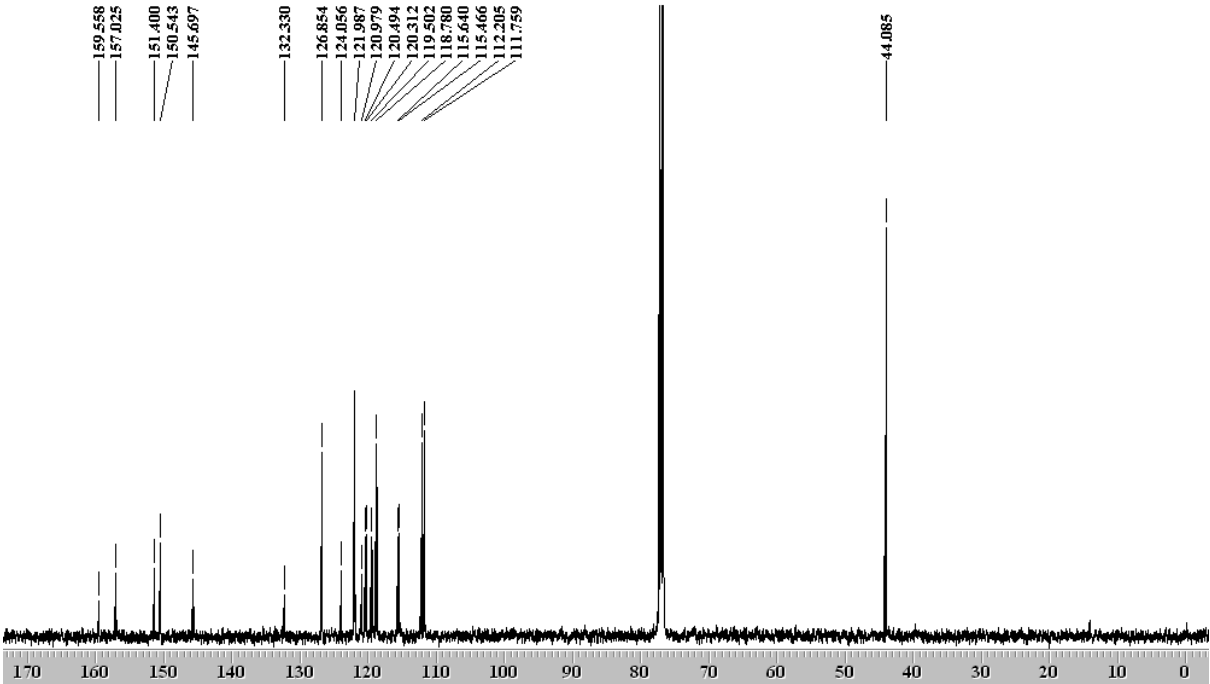

<sup>1</sup>H & <sup>13</sup>C NMR spectra of DBF-15

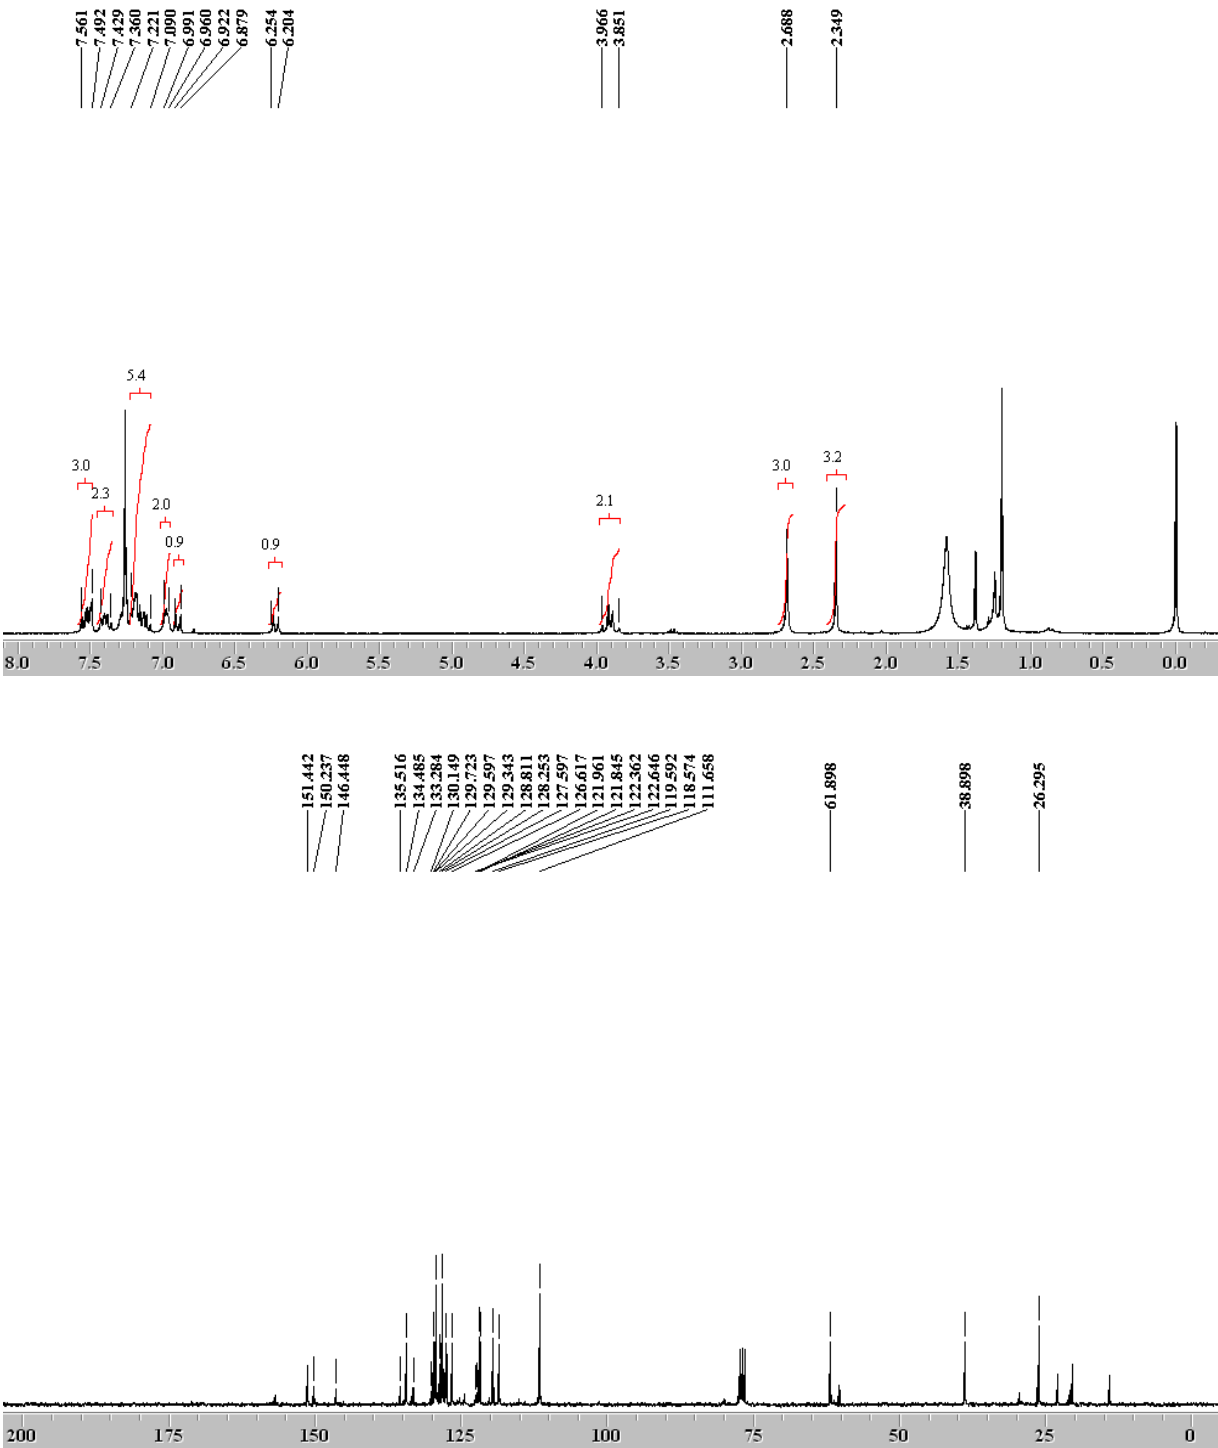

<sup>1</sup>H & <sup>13</sup>C NMR spectra of DBF-16

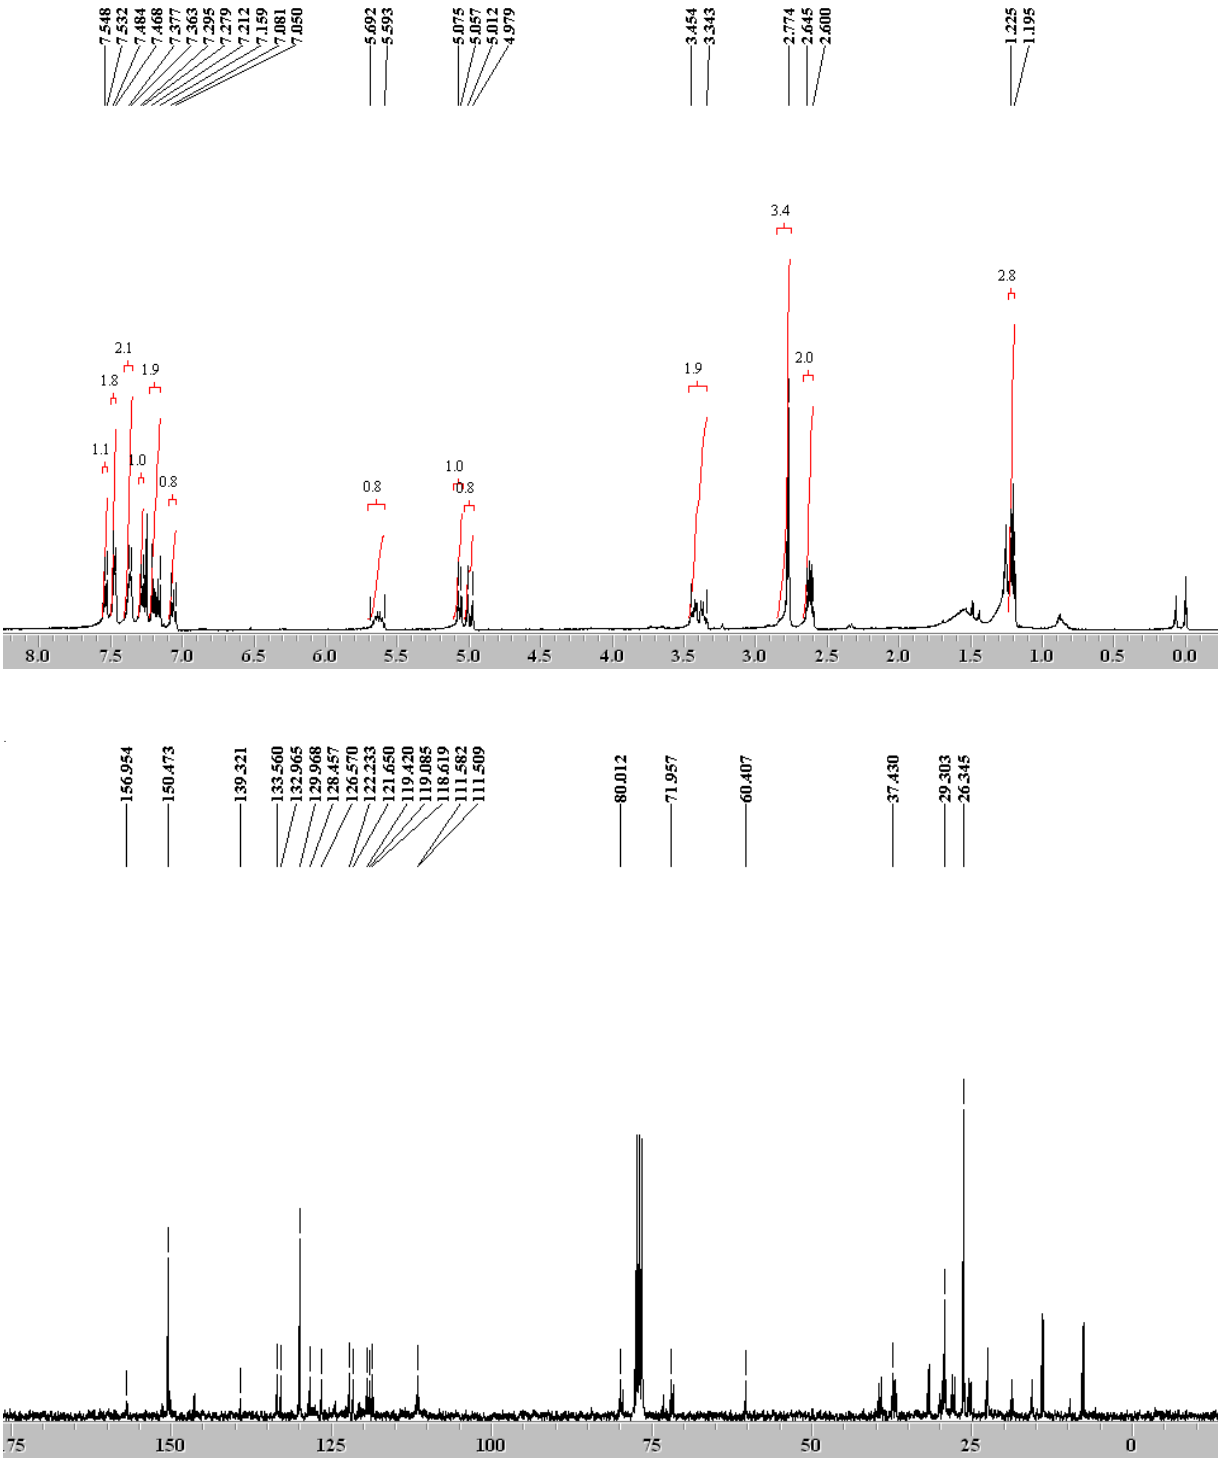

<sup>1</sup>H & <sup>13</sup>C NMR spectra of DBF-18

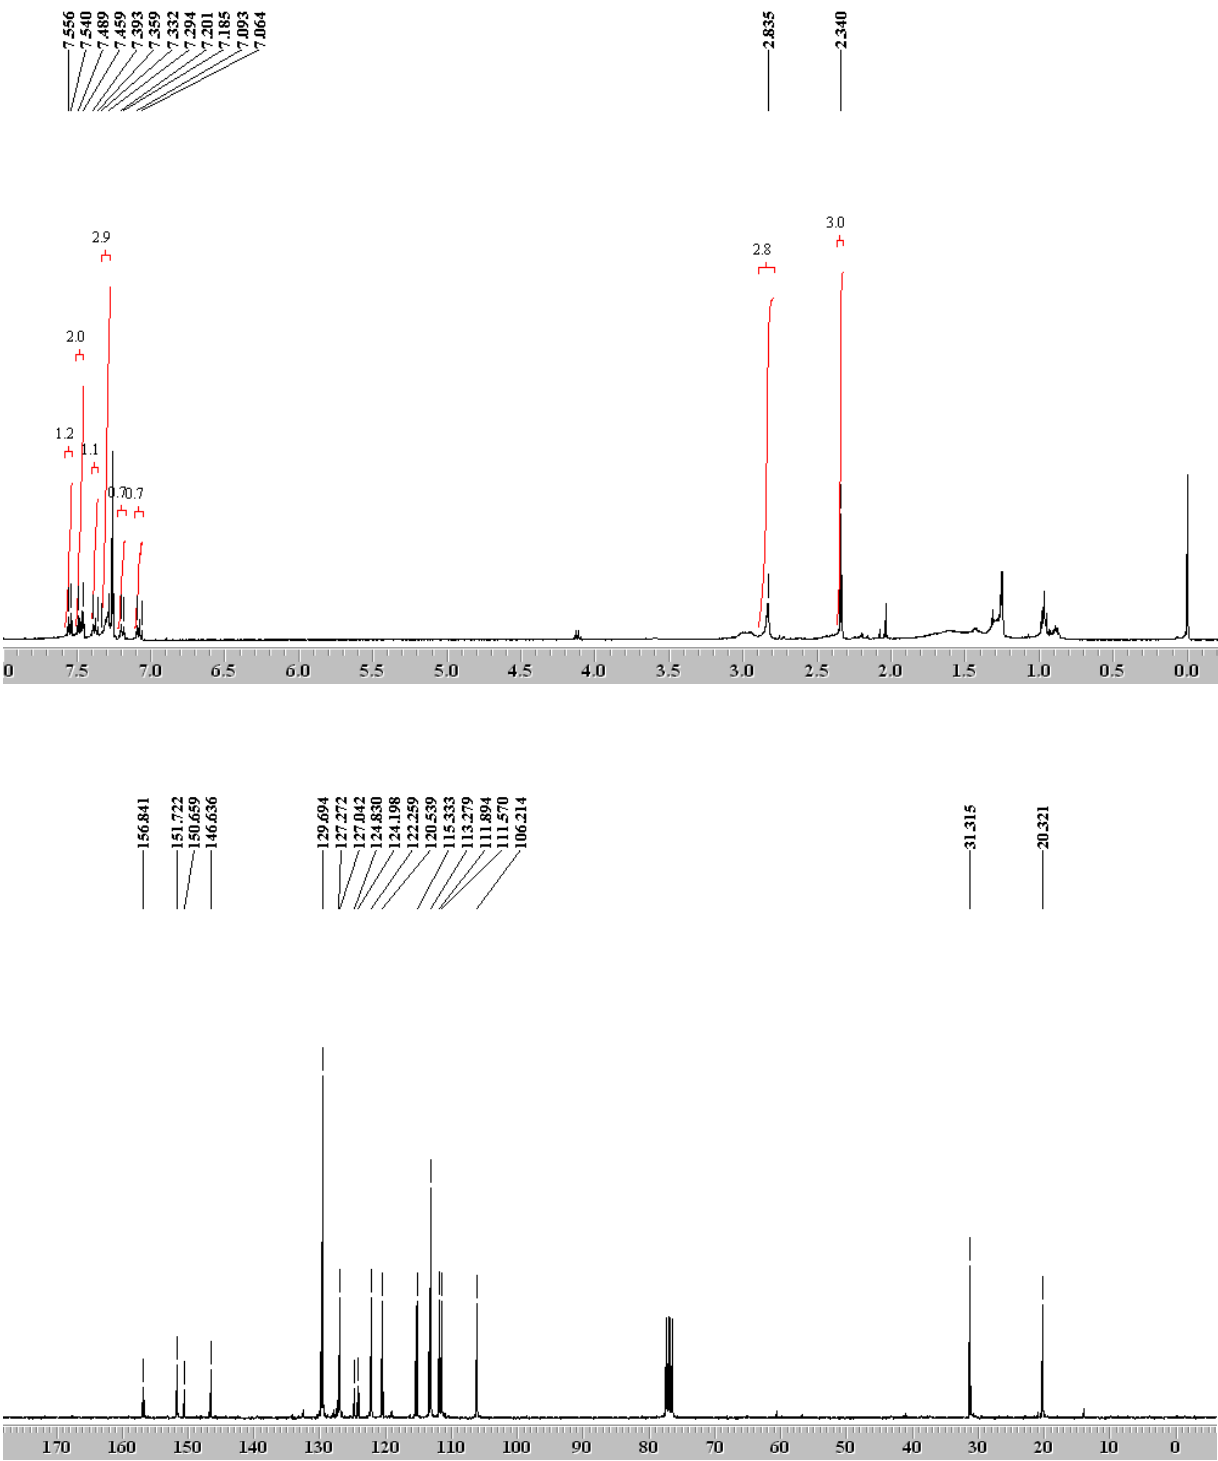

<sup>1</sup>H & <sup>13</sup>C NMR spectra of DBF-19

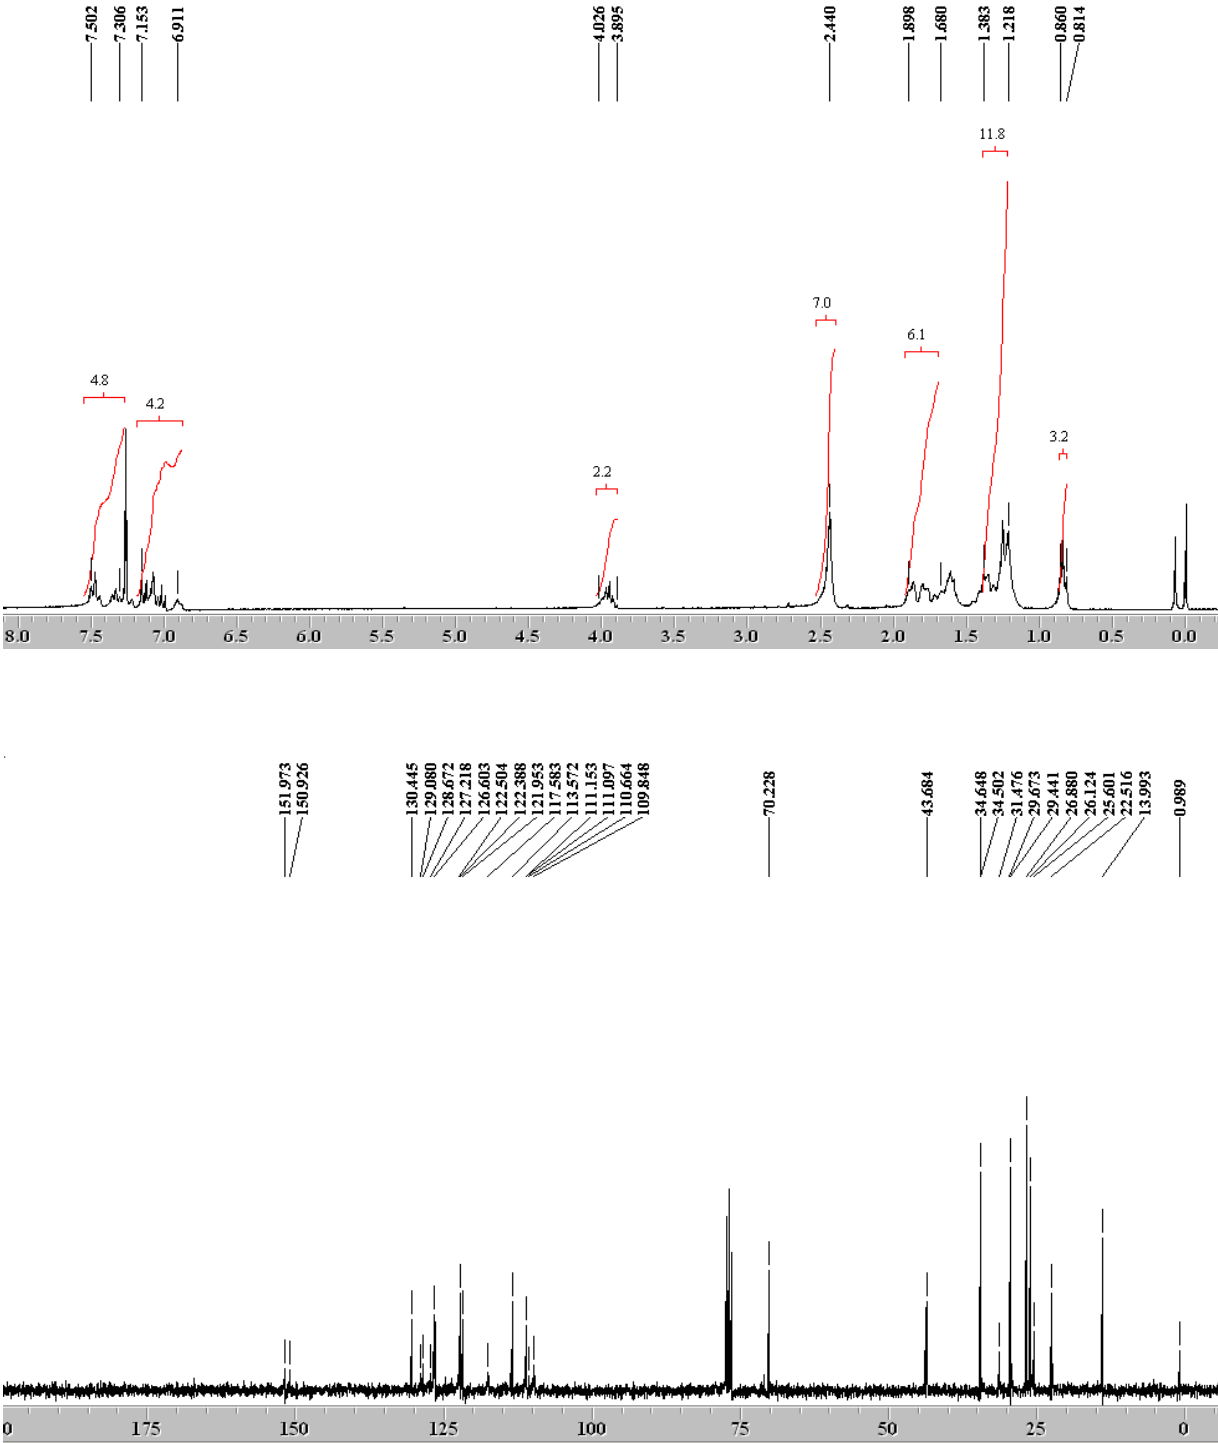

<sup>1</sup>H & <sup>13</sup>C NMR spectra of DBF-21

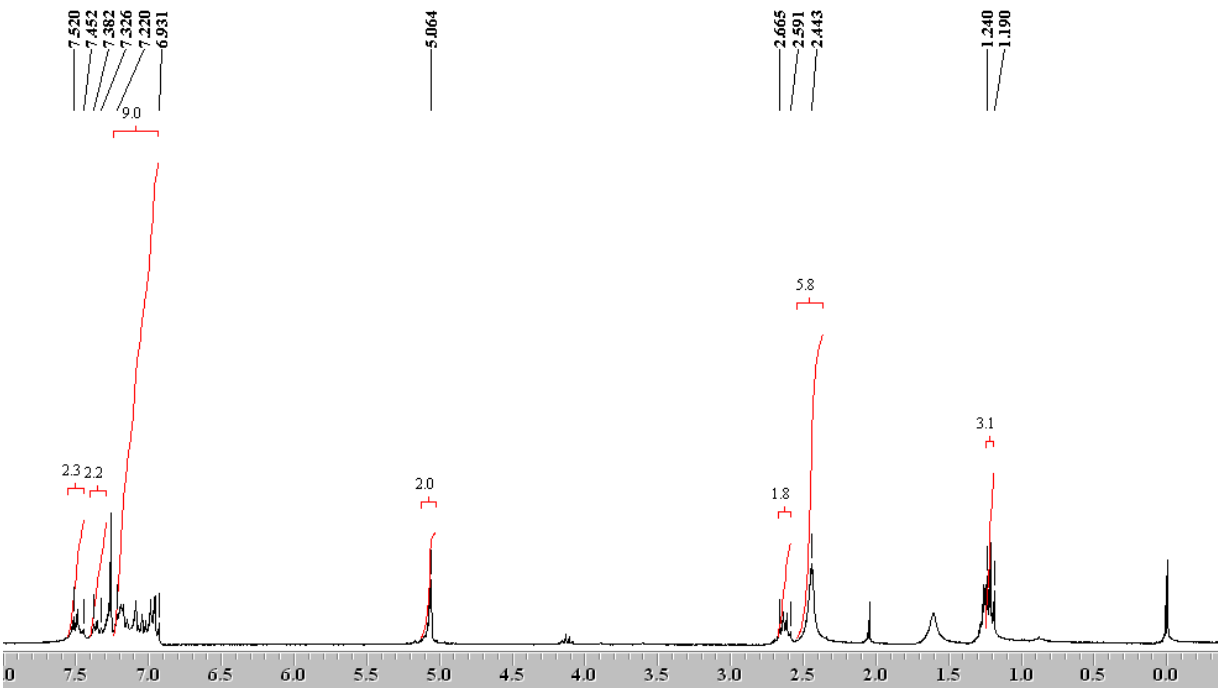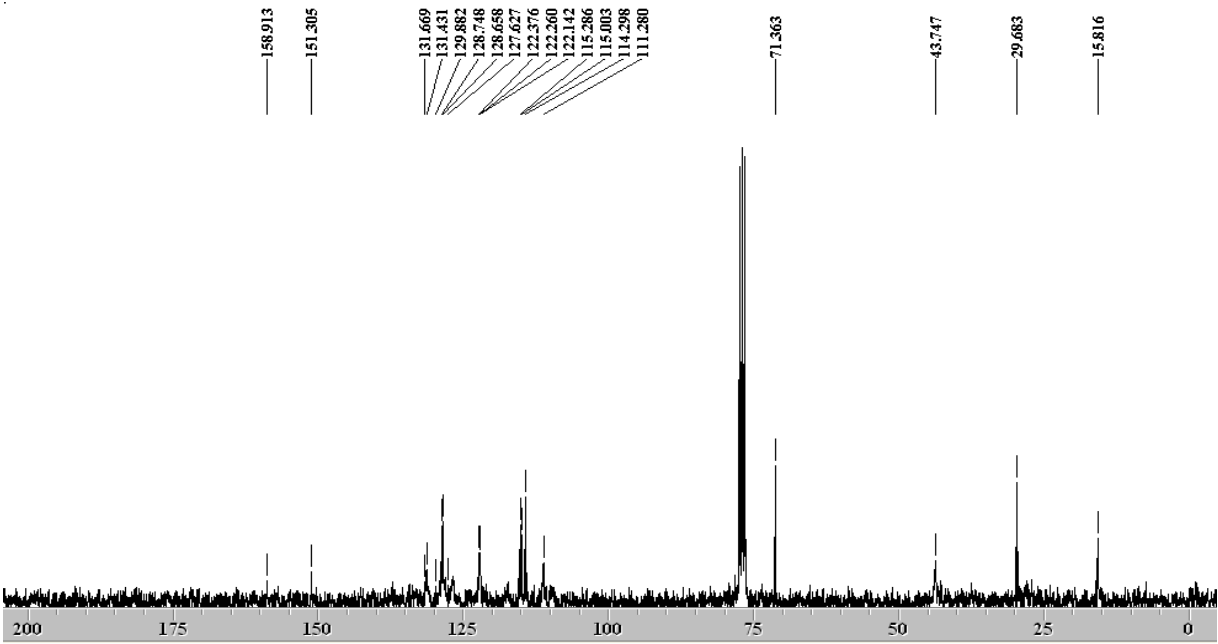

<sup>1</sup>H & <sup>13</sup>C NMR spectra of DBF-9

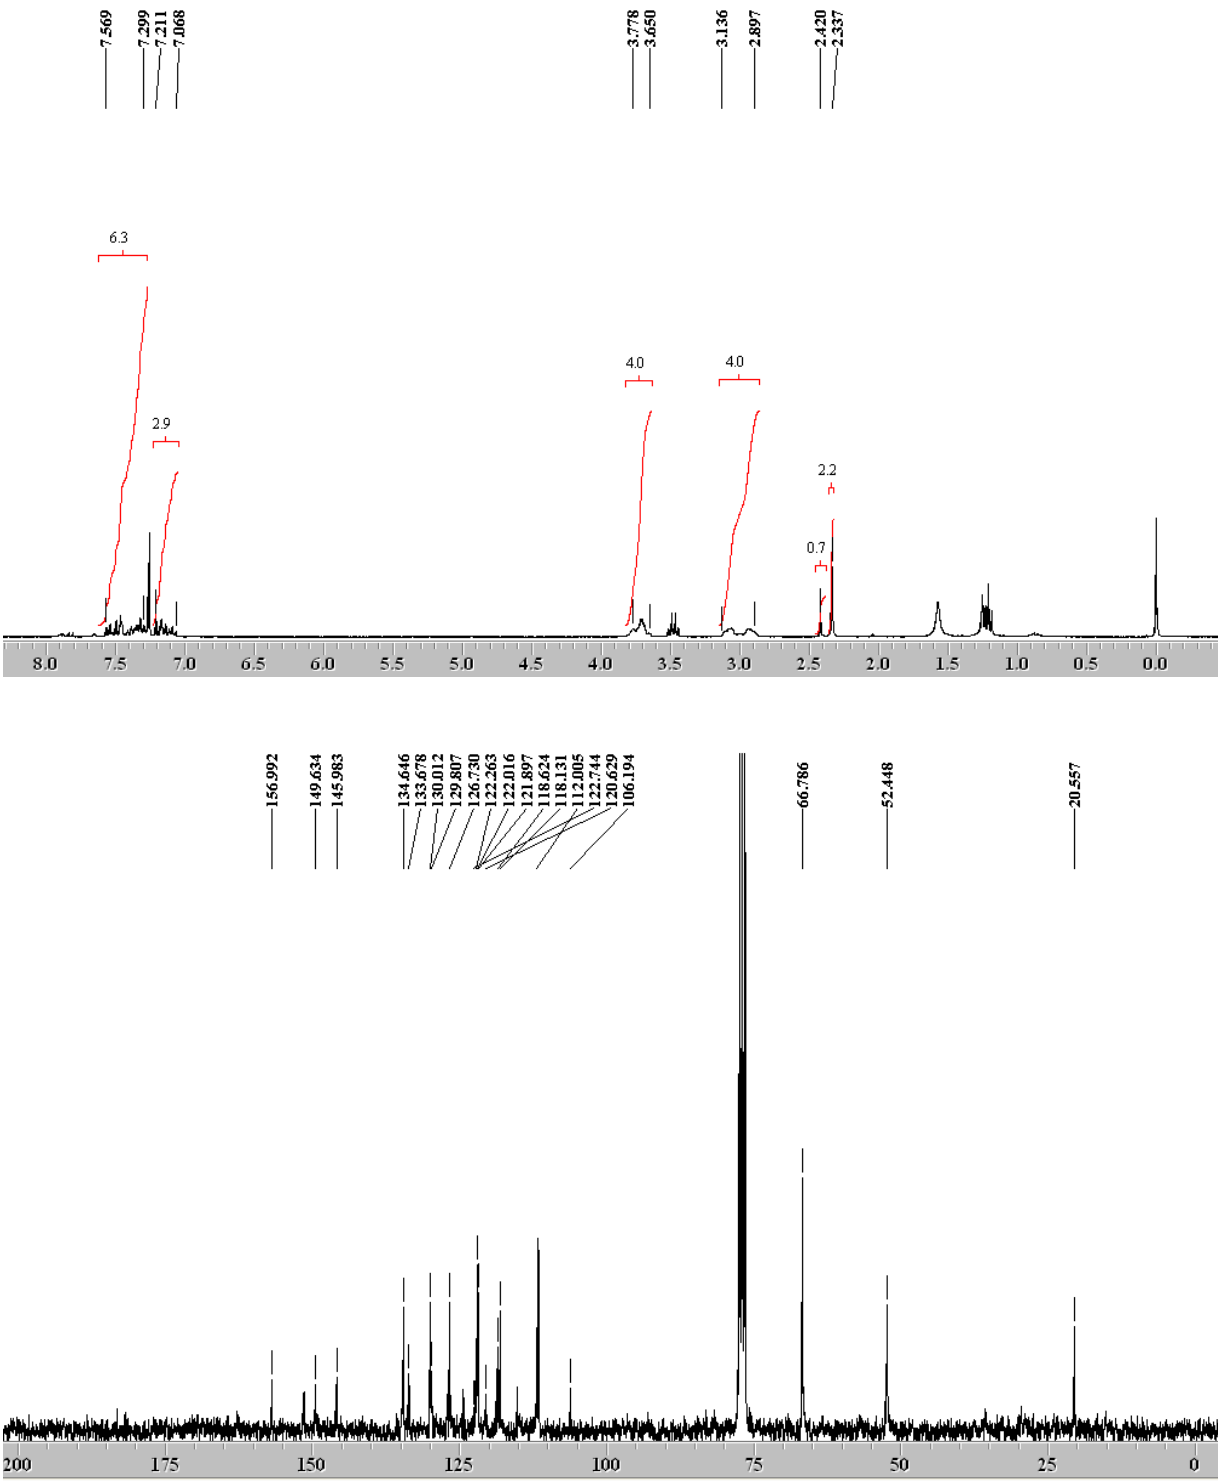

HPLC REPORT

Sample Information

Acquired by : Admin  
Sample Name : DBF-3  
Sample ID : DBF-3  
Injection Volume : 10 uL  
Data Filename : 1211212.lcd  
Method Filename : 2310200.lcm  
Batch Filename :  
Report Filename : RK.lcr  
Date Acquired : 11/14/2012 4:39:59 PM  
Data Processed : 11/29/2012 12:32:15 PM

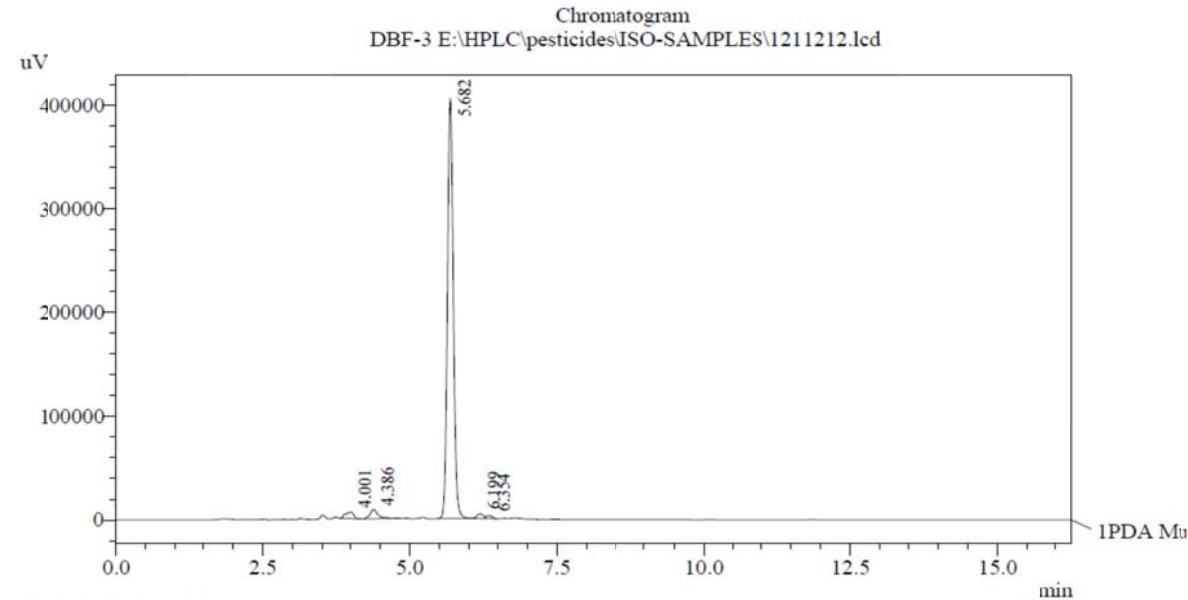

PeakTable

| PDA Ch1 295nm 4nm |           |         |         |            |                |                    |
|-------------------|-----------|---------|---------|------------|----------------|--------------------|
| Peak#             | Ret. Time | Area    | Area %  | Resolution | Tailing Factor | Theoretical Plate# |
| 1                 | 4.001     | 62130   | 2.095   | 0.000      | 0.878          | 3752.987           |
| 2                 | 4.386     | 82925   | 2.796   | 1.542      | 1.434          | 5447.231           |
| 3                 | 5.682     | 2766710 | 93.299  | 5.976      | 1.143          | 13429.517          |
| 4                 | 6.199     | 33619   | 1.134   | 2.396      | 0.000          | 11117.677          |
| 5                 | 6.354     | 20024   | 0.675   | 0.615      | 0.000          | 8978.507           |
| Total             |           | 2965408 | 100.000 |            |                |                    |

| Relative Retention Time |
|-------------------------|
| 0.000                   |
| 0.000                   |
| 0.000                   |
| 0.000                   |
| 0.000                   |
|                         |



Sample Information

Acquired by : Admin  
Sample Name : dbf-4  
Sample ID : dbf-4  
Injection Volume : 5 uL  
Data Filename : 1111202.lcd  
Method Filename : 2310200.lcm  
Batch Filename :  
Report Filename : RK.lcr  
Date Acquired : 11/1/2012 4:24:25 PM  
Data Processed : 11/29/2012 11:39:21 AM

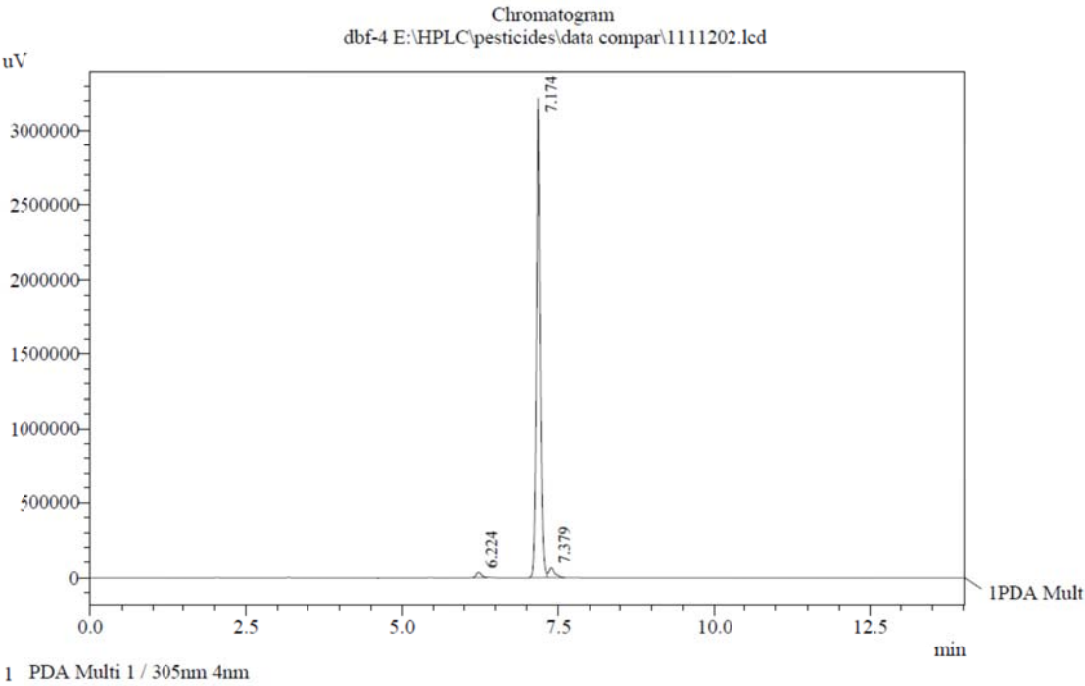

PeakTable

PDA Ch1 305nm 4nm

| Peak# | Ret. Time | Area     | Area %  | Resolution |
|-------|-----------|----------|---------|------------|
| 1     | 6.224     | 196652   | 1.427   | 0.000      |
| 2     | 7.174     | 13144803 | 95.387  | 6.683      |
| 3     | 7.379     | 439009   | 3.186   | 1.267      |
| Total |           | 13780464 | 100.000 |            |

Acquired by : Admin  
Sample Name : DBF-5  
Sample ID : DBF-5  
Injection Volume : 5 uL  
Data Filename : 1111205.lcd  
Method Filename : 2310200.lcm  
Batch Filename :  
Report Filename : RK.lcr  
Date Acquired : 11/1/2012 5:30:02 PM  
Data Processed : 11/20/2012 12:12:15 PM

Sample Information

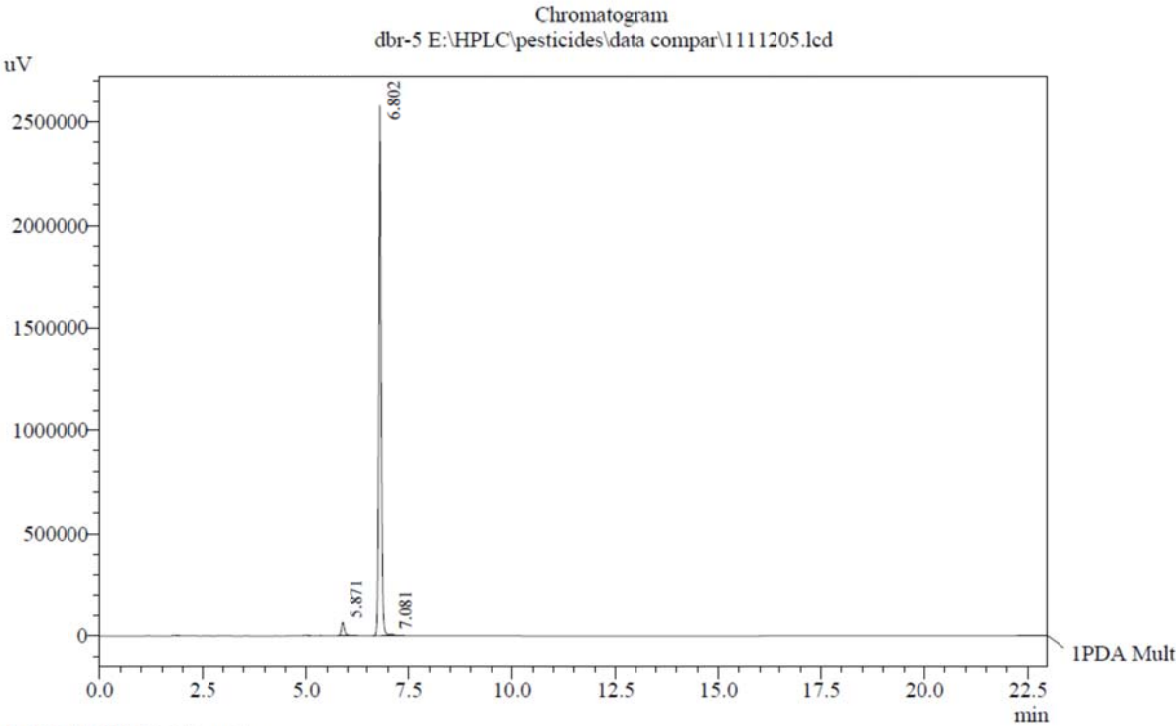

1 IPDA Multi 1 / 254nm 4nm

PeakTable

PDA Ch1 254nm 4nm

| Peak# | Ret. Time | Area     | Area %  | Resolution |
|-------|-----------|----------|---------|------------|
| 1     | 5.871     | 327481   | 3.092   | 0.000      |
| 2     | 6.802     | 10214742 | 96.434  | 7.131      |
| 3     | 7.081     | 50290    | 0.475   | 1.675      |
| Total |           | 10592512 | 100.000 |            |

Sample Information

Acquired by : Admin  
Sample Name : DBF-7  
Sample ID : DBF-7  
Injection Volume : 5 uL  
Data Filename : 1111207.lcd  
Method Filename : 2310200.lcm  
Batch Filename :  
Report Filename : RK.lcr  
Date Acquired : 11/1/2012 6:12:22 PM  
Data Processed : 11/29/2012 11:46:25 AM

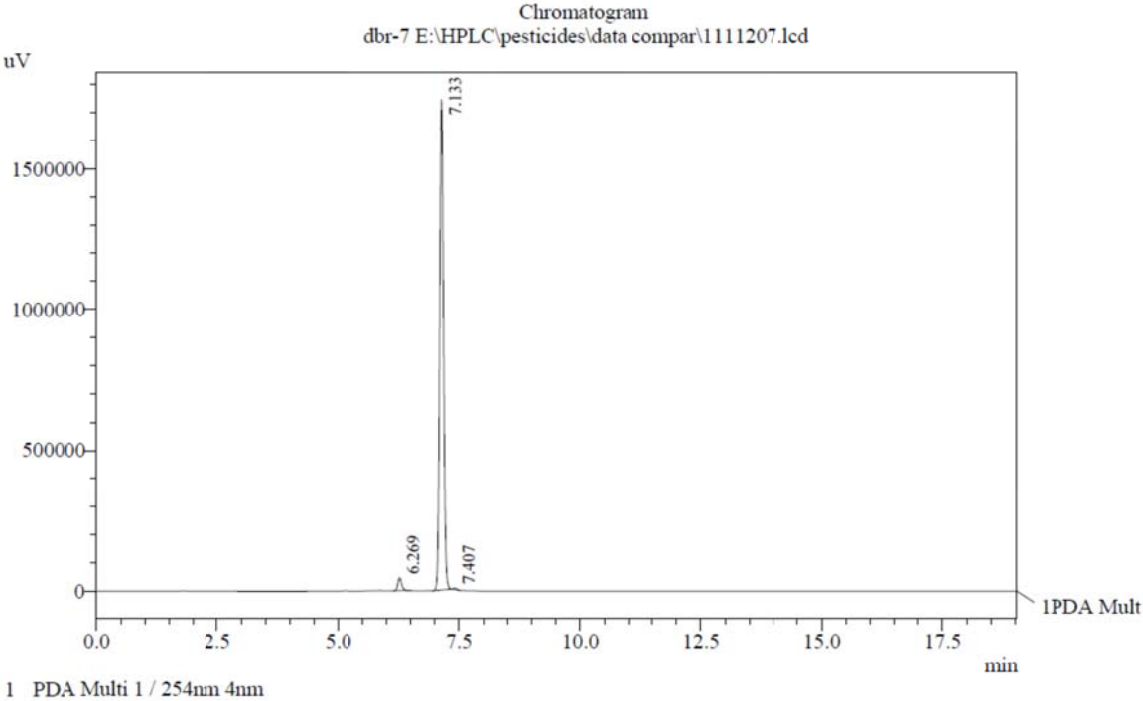

PeakTable

PDA Ch1 254nm 4nm

| Peak# | Ret. Time | Area    | Area %  | Resolution |
|-------|-----------|---------|---------|------------|
| 1     | 6.269     | 251685  | 2.562   | 0.000      |
| 2     | 7.133     | 9549479 | 97.202  | 5.177      |
| 3     | 7.407     | 23168   | 0.236   | 1.737      |
| Total |           | 9824332 | 100.000 |            |

Sample Information

Acquired by : Admin  
Sample Name : dbr-8  
Sample ID : dbr-8  
Injection Volume : 5 uL  
Data Filename : 1111203.lcd  
Method Filename : 2310200.lcm  
Batch Filename :  
Report Filename : RK.lcr  
Date Acquired : 11/1/2012 4:47:09 PM  
Data Processed : 11/29/2012 11:44:49 AM

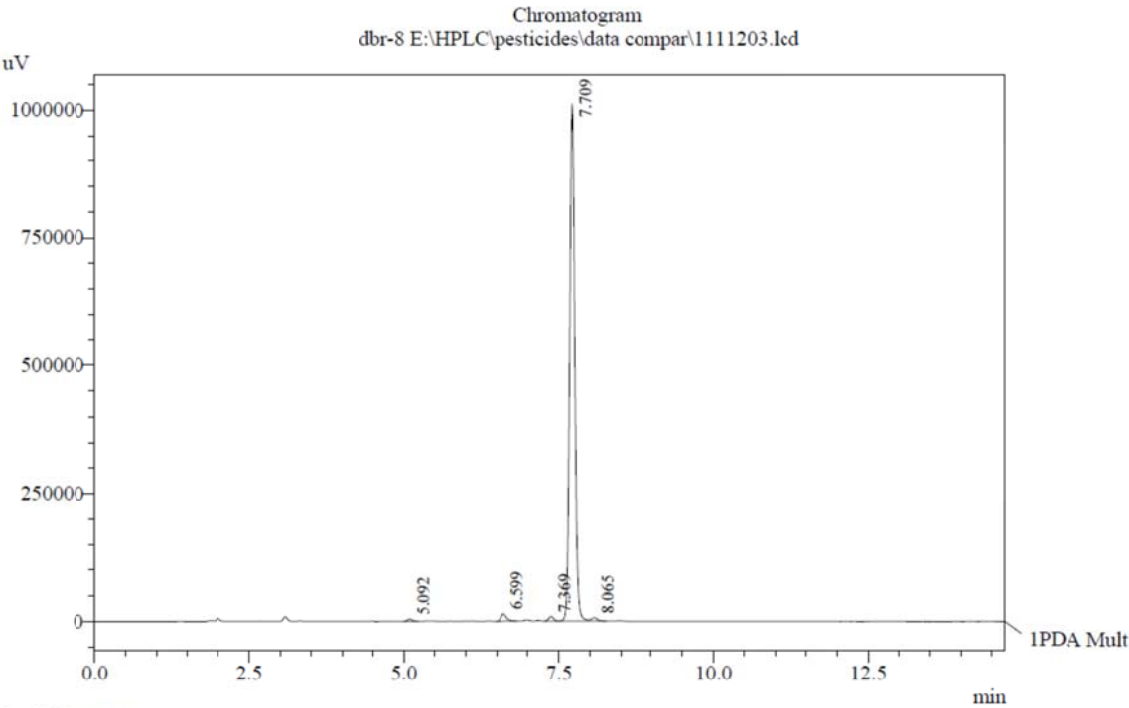

1 PDA Multi 1 / 305nm 4nm

PeakTable

PDA Ch1 305nm 4nm

| Peak# | Ret. Time | Area    | Area %  | Resolution |
|-------|-----------|---------|---------|------------|
| 1     | 5.092     | 23769   | 0.397   | 0.000      |
| 2     | 6.599     | 87283   | 1.457   | 9.029      |
| 3     | 7.369     | 47516   | 0.793   | 4.646      |
| 4     | 7.709     | 5786349 | 96.587  | 2.070      |
| 5     | 8.065     | 45911   | 0.766   | 1.852      |
| Total |           | 5990828 | 100.000 |            |

Sample Information

Acquired by : Admin  
Sample Name : DBF-9  
Sample ID : DBF-9  
Injection Volume : 10 uL  
Data Filename : 1211213.lcd  
Method Filename : 2310200.lcm  
Batch Filename :  
Report Filename : RK.lcr  
Date Acquired : 11/14/2012 4:57:38 PM  
Data Processed : 11/29/2012 12:33:48 PM

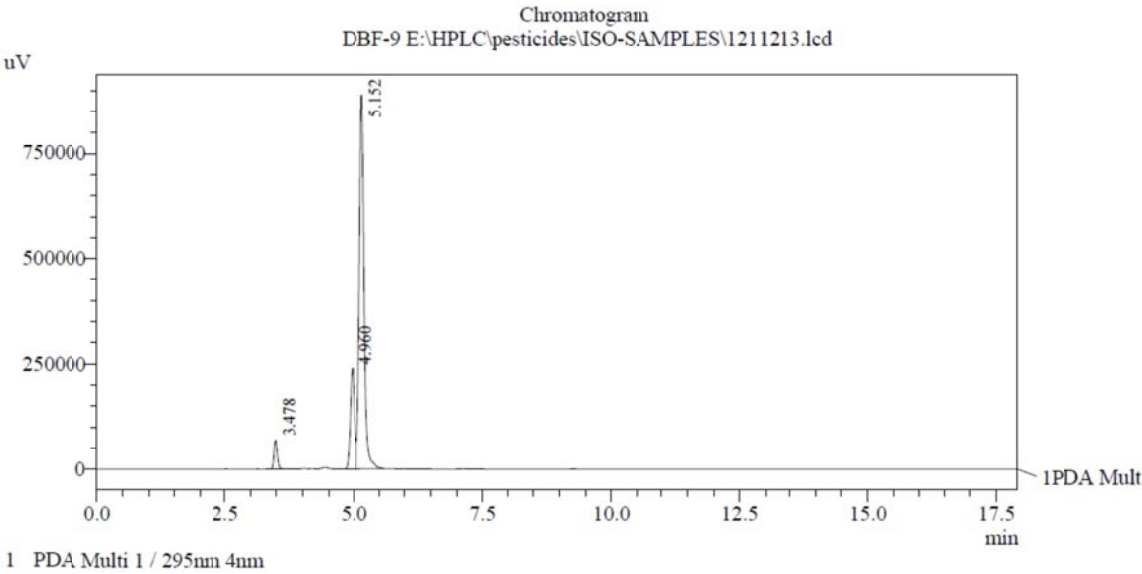

PeakTable

PDA Ch1 295nm 4nm

| Peak# | Ret. Time | Area    | Area %  | Resolution | Tailing Factor | Theoretical Plate# |
|-------|-----------|---------|---------|------------|----------------|--------------------|
| 1     | 3.478     | 306209  | 3.989   | 0.000      | 1.267          | 10471.542          |
| 2     | 4.960     | 1455283 | 18.957  | 9.296      | 0.000          | 11742.620          |
| 3     | 5.152     | 5915353 | 77.054  | 1.035      | 0.000          | 12078.227          |
| Total |           | 7676846 | 100.000 |            |                |                    |

| Relative Retention |
|--------------------|
| 0.000              |
| 0.000              |
| 0.000              |
|                    |

Sample Information

Acquired by : Admin  
Sample Name : DBF-13  
Sample ID : DBF-13  
Injection Volume : 5 uL  
Data Filename : 1111206.lcd  
Method Filename : 2310200.lcm  
Batch Filename :  
Report Filename : RK.lcr  
Date Acquired : 11/1/2012 5:53:50 PM  
Data Processed : 11/20/2012 12:11:51 PM

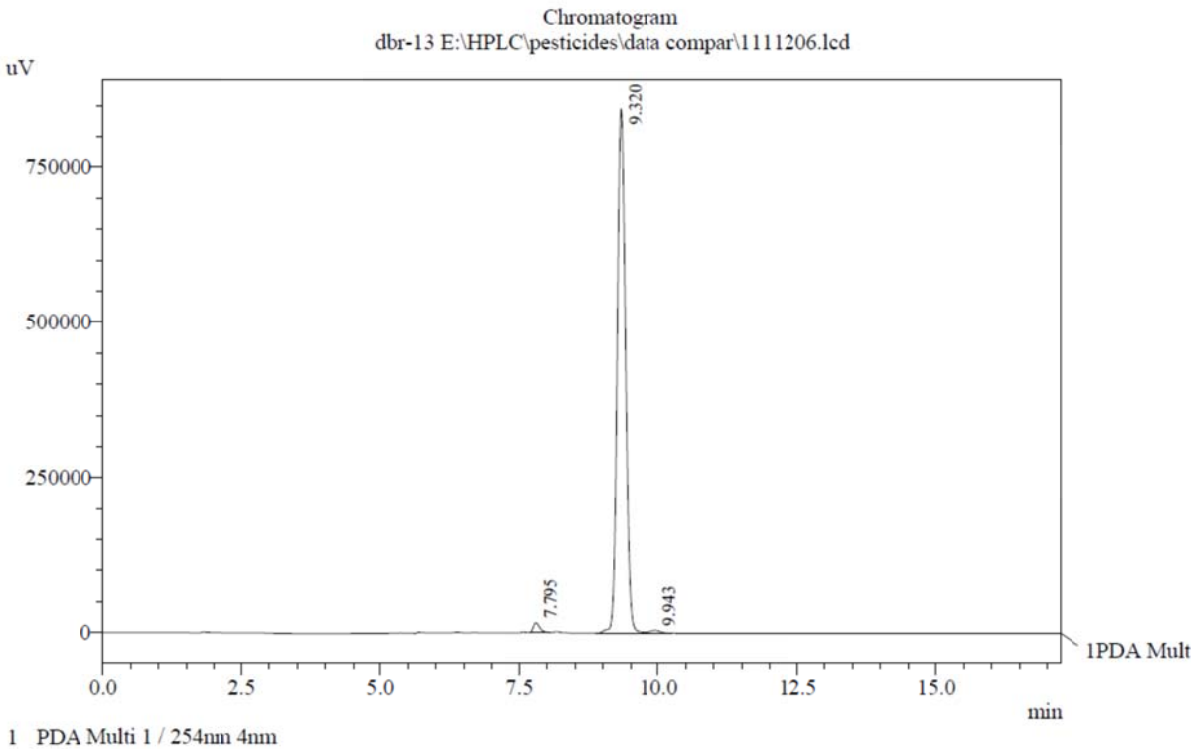

PeakTable

| PDA Ch1 254nm 4nm |           |         |         |            |
|-------------------|-----------|---------|---------|------------|
| Peak#             | Ret. Time | Area    | Area %  | Resolution |
| 1                 | 7.795     | 126474  | 1.419   | 0.000      |
| 2                 | 9.320     | 8723796 | 97.890  | 6.044      |
| 3                 | 9.943     | 61589   | 0.691   | 1.902      |
| Total             |           | 8911858 | 100.000 |            |

Sample Information

Acquired by : Admin  
Sample Name : DBF-14  
Sample ID : DBF-14  
Injection Volume : 20 uL  
Data Filename : 27011305.lcd  
Method Filename : ANALYSIS.lcm  
Batch Filename :  
Report Filename : RK.lcr  
Date Acquired : 1/28/2013 2:35:40 PM  
Data Processed : 2/2/2013 5:19:16 PM

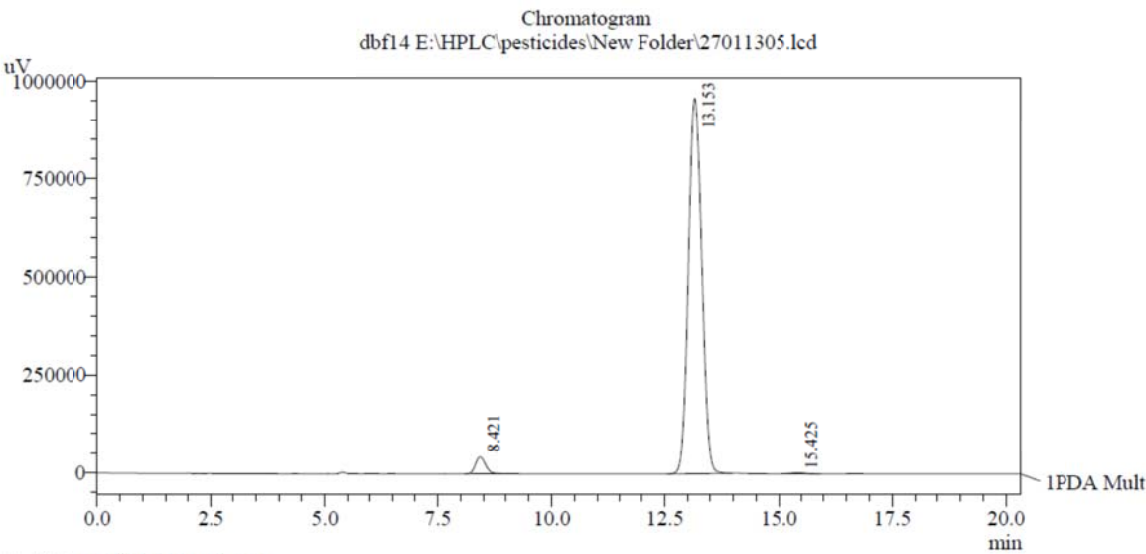

PeakTable

| PDA Ch1 254nm 4nm |           |          |         |            |                |                    |
|-------------------|-----------|----------|---------|------------|----------------|--------------------|
| Peak#             | Ret. Time | Area     | Area %  | Resolution | Tailing Factor | Theoretical Plate# |
| 1                 | 8.421     | 667276   | 3.320   | 0.000      | 1.184          | 6618.971           |
| 2                 | 13.153    | 19372383 | 96.392  | 9.864      | 1.095          | 9306.630           |
| 3                 | 15.425    | 57748    | 0.287   | 3.980      | 1.168          | 10704.193          |
| Total             |           | 20097408 | 100.000 |            |                |                    |

| Relative Retention |
|--------------------|
| 0.000              |
| 0.000              |
| 0.000              |
|                    |

Sample Information

Acquired by : Admin  
Sample Name : DBF-15  
Sample ID : DBF-15  
Injection Volume : 5 uL  
Data Filename : 1111204.lcd  
Method Filename : 2310200.lcm  
Batch Filename :  
Report Filename : RK.lcr  
Date Acquired : 11/1/2012 5:05:10 PM  
Data Processed : 2/2/2013 5:00:37 PM

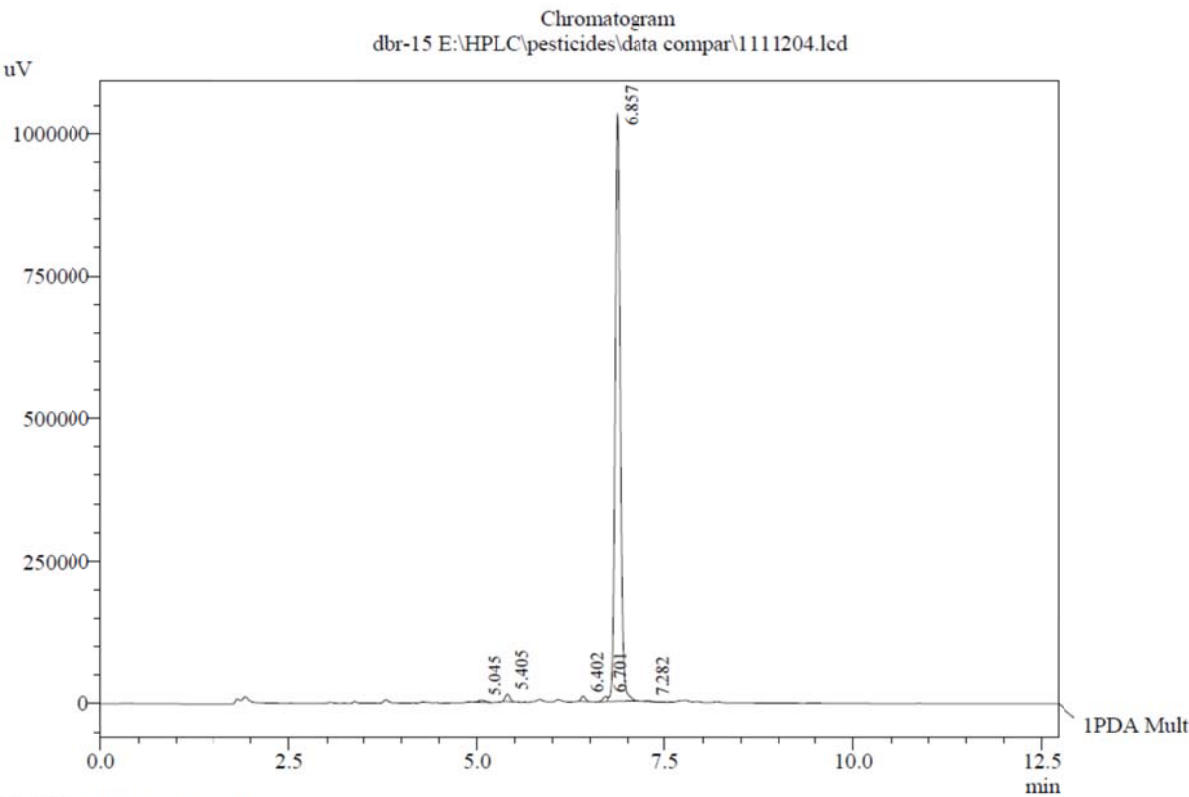

1 PDA Multi 1 / 254nm 4nm

PeakTable

| PDA Ch1 254nm 4nm |           |         |         |            |
|-------------------|-----------|---------|---------|------------|
| Peak#             | Ret. Time | Area    | Area %  | Resolution |
| 1                 | 5.045     | 22325   | 0.443   | 0.000      |
| 2                 | 5.405     | 53731   | 1.066   | 2.286      |
| 3                 | 6.402     | 34665   | 0.688   | 8.053      |
| 4                 | 6.701     | 39017   | 0.774   | 1.865      |
| 5                 | 6.857     | 4886933 | 96.930  | 0.909      |
| 6                 | 7.282     | 5068    | 0.101   | 3.169      |
| Total             |           | 5041740 | 100.000 |            |



Sample Information

Acquired by : Admin  
Sample Name : DBF-16  
Sample ID : DBF-16  
Injection Volume : 10 uL  
Data Filename : 1211215.lcd  
Method Filename : 2310200.lcm  
Batch Filename :  
Report Filename : RK.lcr  
Date Acquired : 11/14/2012 5:34:37 PM  
Data Processed : 11/29/2012 12:35:21 PM

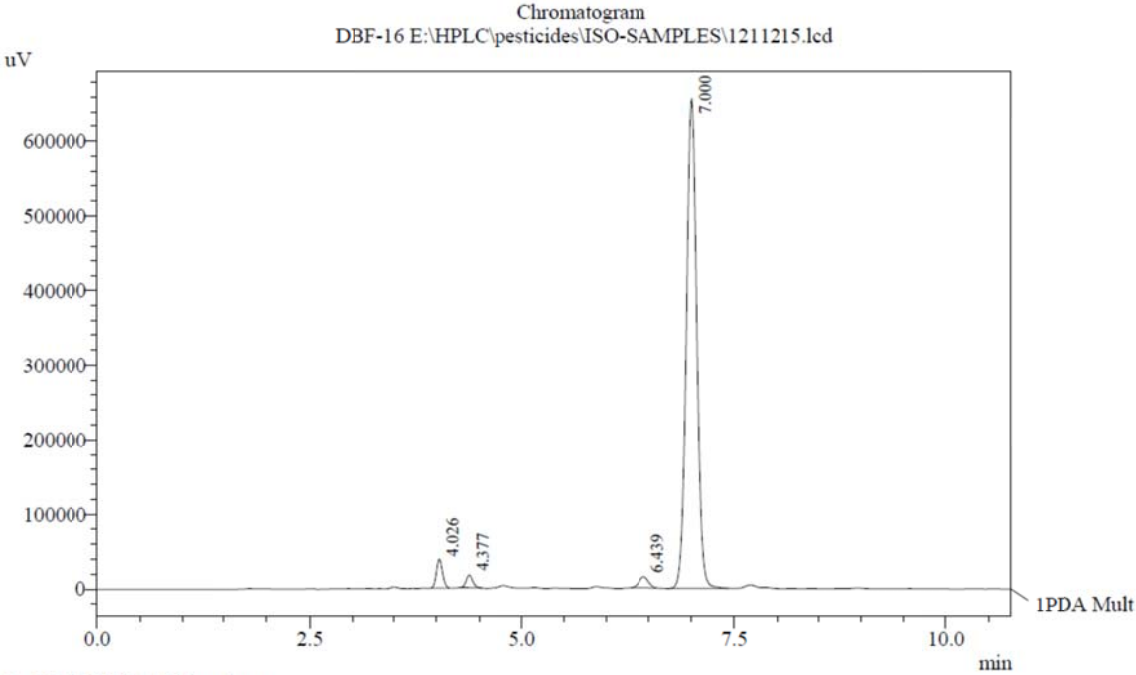

1 PDA Multi 1 / 295nm 4nm

PeakTable

PDA Ch1 295nm 4nm

| Peak# | Ret. Time | Area    | Area %  | Resolution | Tailing Factor | Theoretical Plate# |
|-------|-----------|---------|---------|------------|----------------|--------------------|
| 1     | 4.026     | 190055  | 3.218   | 0.000      | 1.200          | 11687.889          |
| 2     | 4.377     | 89773   | 1.520   | 2.289      | 1.218          | 12334.311          |
| 3     | 6.439     | 118820  | 2.012   | 10.602     | 1.028          | 12392.278          |
| 4     | 7.000     | 5507269 | 93.250  | 2.405      | 1.062          | 14211.387          |
| Total |           | 5905917 | 100.000 |            |                |                    |

| Relative Retention Time |
|-------------------------|
| 0.000                   |
| 0.000                   |
| 0.000                   |
| 0.000                   |
|                         |

Sample Information

Acquired by : Admin  
Sample Name : DBF-18  
Sample ID : DBF-18  
Injection Volume : 10 uL  
Data Filename : 1211211.lcd  
Method Filename : 2310200.lcm  
Batch Filename :  
Report Filename : RK.lcr  
Date Acquired : 11/14/2012 4:16:28 PM  
Data Processed : 11/29/2012 12:30:40 PM

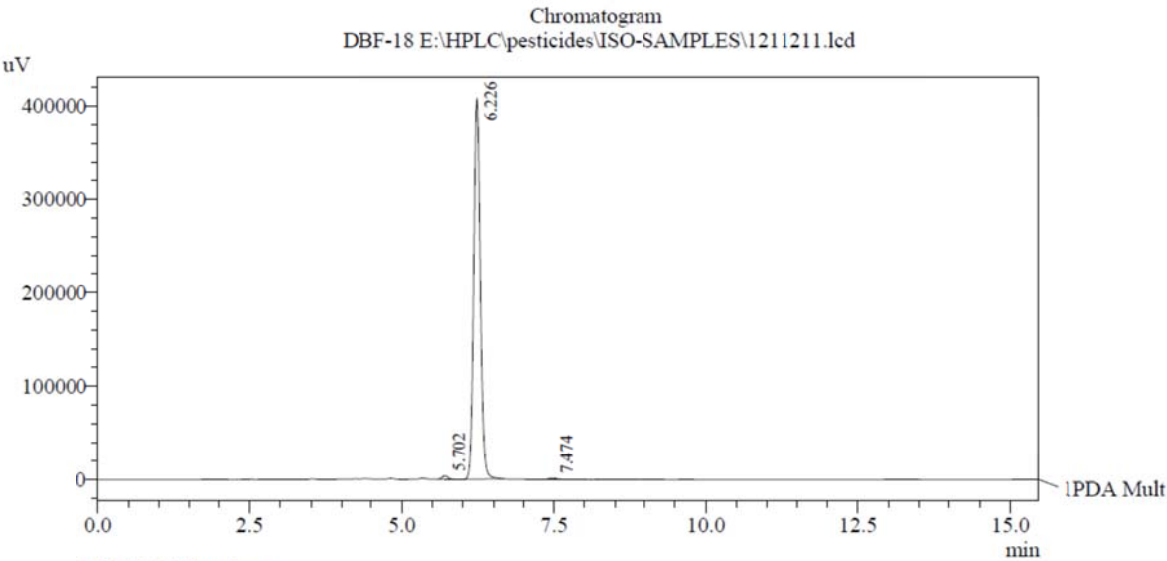

PeakTable

PDA Ch1 295nm 4nm

| Peak# | Ret. Time | Area    | Area %  | Resolution | Tailing Factor | Theoretical Plate# |
|-------|-----------|---------|---------|------------|----------------|--------------------|
| 1     | 5.702     | 25485   | 0.822   | 0.000      | 1.175          | 14161.579          |
| 2     | 6.226     | 3062636 | 98.769  | 2.589      | 1.143          | 13715.828          |
| 3     | 7.474     | 12673   | 0.409   | 5.440      | 1.170          | 14732.618          |
| Total |           | 3100793 | 100.000 |            |                |                    |

| Relative Retention |
|--------------------|
| 0.000              |
| 0.000              |
| 0.000              |
|                    |

Sample Information

Acquired by : Admin  
Sample Name : dbf-19  
Sample ID : dbf-19  
Injection Volume : 20 uL  
Data Filename : 21041304.lcd  
Method Filename : mip.lcm  
Batch Filename :  
Report Filename : RK.lcr  
Date Acquired : 4/21/2013 1:24:15 PM  
Data Processed : 4/22/2013 10:38:36 AM

Chromatogram

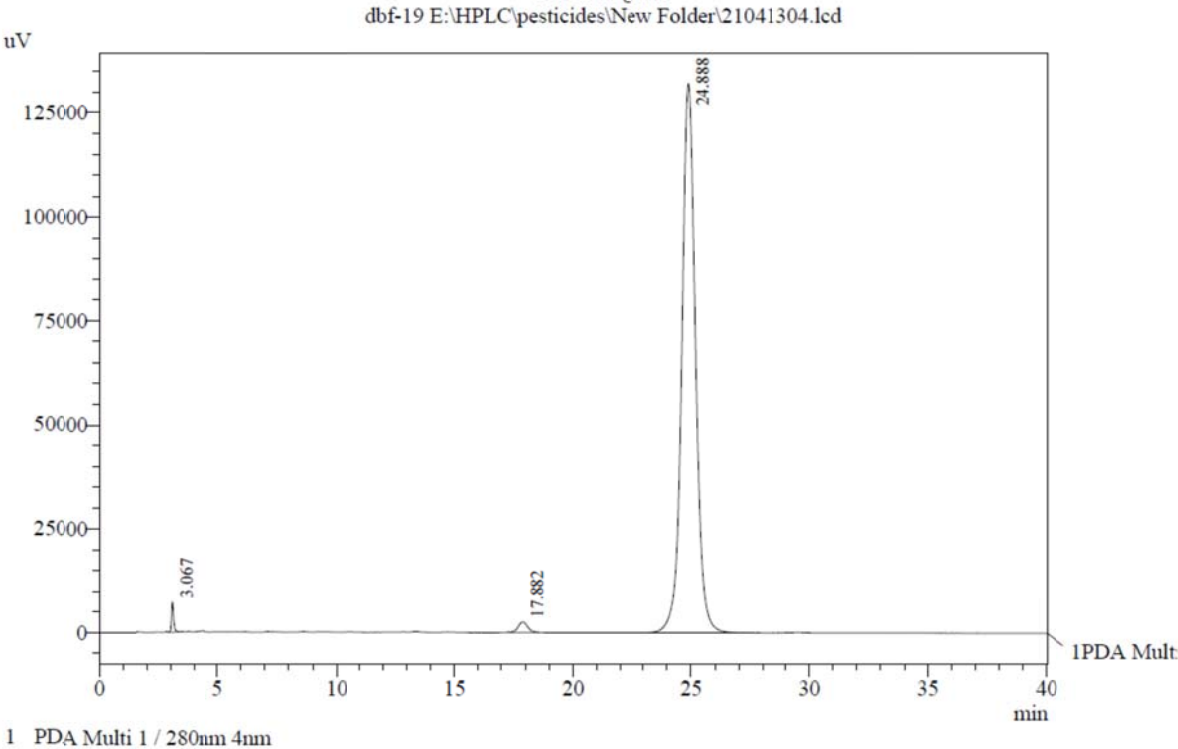

PeakTable

PDA Cl1 280nm 4nm

| Peak# | Ret. Time | Area    | Area %  |
|-------|-----------|---------|---------|
| 1     | 3.067     | 44967   | 0.837   |
| 2     | 17.882    | 69046   | 1.285   |
| 3     | 24.888    | 5259478 | 97.878  |
| Total |           | 5373491 | 100.000 |

Sample Information

Acquired by : Admin  
Sample Name : DBF-20  
Sample ID : DBF-20  
Injection Volume : 20 uL  
Data Filename : 27011304.lcd  
Method Filename : ANALYSIS.lcm  
Batch Filename :  
Report Filename : RK.lcr  
Date Acquired : 1/28/2013 1:04:59 PM  
Data Processed : 1/29/2013 3:27:08 PM

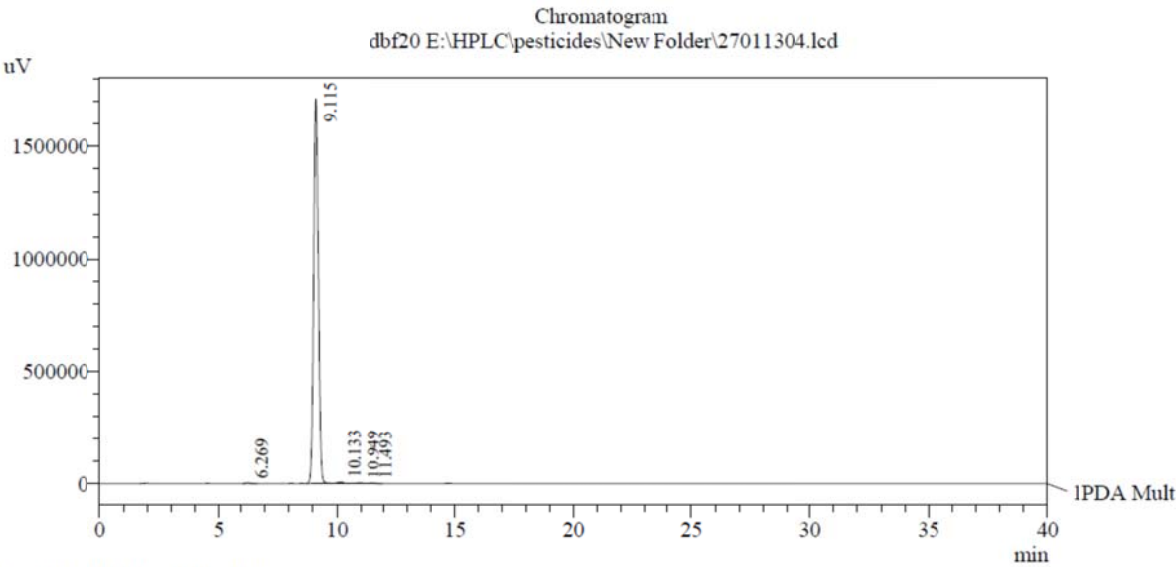

PeakTable

| PDA Ch1 254nm 4nm |           |          |         |            |                |                    |
|-------------------|-----------|----------|---------|------------|----------------|--------------------|
| Peak#             | Ret. Time | Area     | Area %  | Resolution | Tailing Factor | Theoretical Plate# |
| 1                 | 6.269     | 52359    | 0.223   | 0.000      | 1.331          | 5364.858           |
| 2                 | 9.115     | 23262750 | 99.020  | 7.920      | 1.108          | 9390.276           |
| 3                 | 10.133    | 89936    | 0.383   | 2.601      | 1.078          | 9949.893           |
| 4                 | 10.949    | 42193    | 0.180   | 2.022      | 1.088          | 11935.131          |
| 5                 | 11.493    | 45714    | 0.195   | 1.218      | 1.243          | 8717.667           |
| Total             |           | 23492951 | 100.000 |            |                |                    |

| Relative Retention Time |
|-------------------------|
| 0.000                   |
| 0.000                   |
| 0.000                   |
| 0.000                   |
| 0.000                   |
| 0.000                   |

Sample Information

Acquired by : Admin  
Sample Name : DBF-21  
Sample ID : DBF-21  
Injection Volume : 20 uL  
Data Filename : 27011306.lcd  
Method Filename : ANALYSIS.lcm  
Batch Filename :  
Report Filename : RK.lcr  
Date Acquired : 1/28/2013 2:57:41 PM  
Data Processed : 2/2/2013 5:25:23 PM

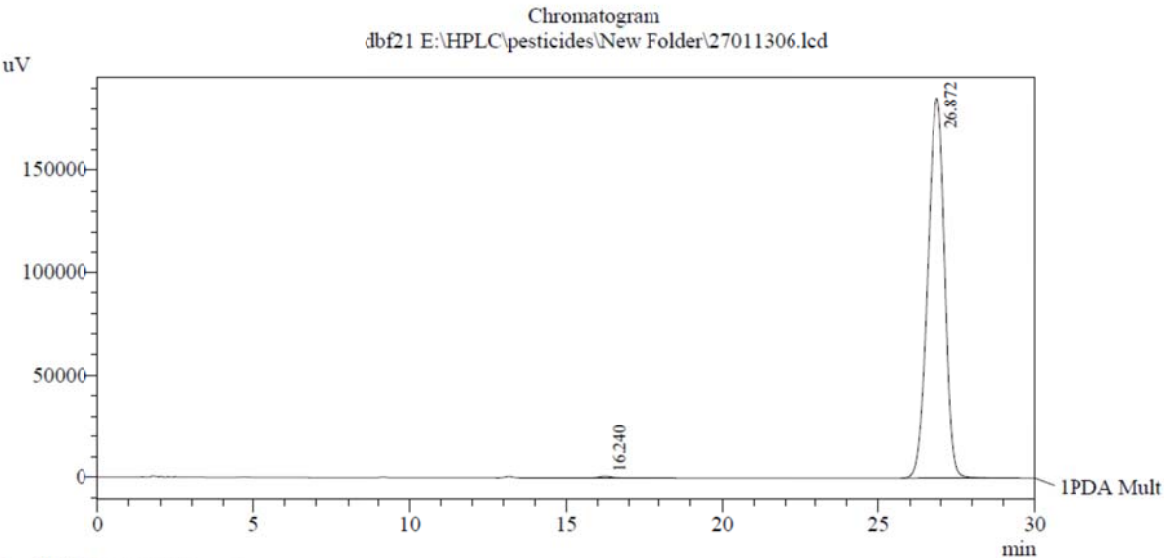

1 PDA Multi 1 / 295nm 4nm

PeakTable

| PDA Ch1 295nm 4nm |           |         |         |            |                |                    |
|-------------------|-----------|---------|---------|------------|----------------|--------------------|
| Peak#             | Ret. Time | Area    | Area %  | Resolution | Tailing Factor | Theoretical Plate# |
| 1                 | 16.240    | 20583   | 0.290   | 0.000      | 1.133          | 7823.380           |
| 2                 | 26.872    | 7089297 | 99.710  | 12.155     | 0.940          | 11215.512          |
| Total             |           | 7109880 | 100.000 |            |                |                    |

| Relative Retention |
|--------------------|
| 0.000              |
| 0.000              |
|                    |
